1  
2  
3  
4  
5  
6  
7  
8  
9  
10  
11  
12  
13  
14  
15  
16  
17  
18  
19  
20  
21  
22  
23

**Comparison of methods that use whole genome data to estimate the heritability and genetic architecture of complex traits.**

Luke M. Evans<sup>1,7</sup>, Rasool Tahmasbi<sup>1</sup>, Scott I. Vrieze<sup>1</sup>, Gonçalo R. Abecasis<sup>2</sup>, Sayantan Das<sup>2</sup>,  
Doug W. Bjelland<sup>1</sup>, Teresa R. deCandia<sup>1</sup>, Haplotype Reference Consortium, Michael E.  
Goddard<sup>3</sup>, Benjamin M. Neale<sup>5</sup>, Jian Yang<sup>4</sup>, Peter M. Visscher<sup>4</sup>, Matthew C. Keller<sup>1,6,7</sup>

<sup>1</sup>Institute for Behavioral Genetics, University of Colorado, Boulder, CO 80309

<sup>2</sup>Center for Statistical Genetics, Department of Biostatistics, University of Michigan, Ann Arbor, MI 48109

<sup>3</sup>Faculty of Veterinary and Agricultural Science, University of Melbourne, Parkville, Victoria, Australia

<sup>4</sup>Institute for Molecular Bioscience and the Queensland Brain Institute, University of Queensland, Brisbane, 4072, Queensland, Australia

<sup>5</sup>Program in Medical and Population Genetics, Broad Institute of MIT and Harvard, Cambridge, Massachusetts, USA.

<sup>6</sup>Department of Psychology and Neuroscience, University of Colorado, Boulder, CO, 80309

<sup>7</sup>Corresponding authors [luke.m.evans@colorado.edu](mailto:luke.m.evans@colorado.edu) and [matthew.c.keller@gmail.com](mailto:matthew.c.keller@gmail.com)

24 **ABSTRACT**

25 Heritability,  $h^2$ , is a foundational concept in genetics, critical to understanding the genetic  
26 basis of complex traits. Recently-developed methods that estimate heritability from genotyped  
27 SNPs,  $h^2_{SNP}$ , explain substantially more genetic variance than genome-wide significant loci, but  
28 less than classical estimates from twins and families. However,  $h^2_{SNP}$  estimates have yet to be  
29 comprehensively compared under a range of genetic architectures, making it difficult to draw  
30 conclusions from sometimes conflicting published estimates. Here, we used thousands of real  
31 whole genome sequences to simulate realistic phenotypes under a variety of genetic  
32 architectures, including those from very rare causal variants. We compared the performance of  
33 ten methods across different types of genotypic data (commercial SNP array positions, whole  
34 genome sequence variants, and imputed variants) and under differing causal variant  
35 frequencies, levels of stratification, and relatedness thresholds. These results provide guidance  
36 in interpreting past results and choosing optimal approaches for future studies. We then chose  
37 two methods (GREML-MS and GREML-LDMS) that best estimated overall  $h^2_{SNP}$  and the causal  
38 variant frequency spectra to six phenotypes in the UK Biobank using imputed genome-wide  
39 variants. Our results suggest that as imputation reference panels become larger and more  
40 diverse, estimates of the frequency distribution of causal variants will become increasingly  
41 unbiased and the vast majority of trait narrow-sense heritability will be accounted for.

42

43 **KEYWORDS**

44 heritability,  $h^2$ ; complex trait; genetic architecture; GREML

## 45 INTRODUCTION

46           Narrow-sense heritability,  $h^2$ , the proportion of the total phenotypic variance due to  
47 additive genetic variation, is a fundamental concept of medical and quantitative genetics. In  
48 addition to providing an understanding of the genetic basis of traits,  $h^2$  determines the response  
49 to selection, the potential utility of individual genetic risk and trait prediction, and how much of the  
50 phenotypic variability could theoretically be accounted for in genome-wide association studies  
51 (GWAS)<sup>1,2</sup>. Importantly, while GWAS have now identified thousands of variants associated with  
52 complex traits<sup>3-5</sup>, the loci identified by these studies have typically explained only a small fraction  
53 of traits' total heritability, with the remaining genetic variance termed "missing heritability." This  
54 remaining unaccounted for genetic variance may be attributable to a variety of causes, including  
55 the role of (typically rare) variants poorly tagged by arrays, small effect common variants that do  
56 not reach genome-wide significance due to insufficient sample sizes, or inflated family-based  $h^2$   
57 estimates<sup>1,6-8</sup>.

58           While traditional family-based estimates of heritability,  $h^2_{FAM}$ , have provided valuable  
59 insights<sup>9</sup>, the use of close relatives means that estimates of additive genetic variance can be  
60 biased by factors shared by close relatives—for example, the joint action of non-additive genetic  
61 and common environmental effects can inflate estimates of additive genetic variation<sup>10,11</sup>.  
62 Recently-developed approaches that utilize unrelated individuals to estimate the variance  
63 explained by all genotyped single nucleotide polymorphisms (SNPs), denoted as  $h^2_{SNP}$ , have the  
64 advantage of being unaffected by these sources of bias, and for many traits have found that a  
65 large proportion of the heritability is captured by common variants<sup>6,12,13</sup>. For certain complex  
66 traits, such as height, little unexplained additive genetic variance remains, as  $h^2_{SNP}$  approaches  
67  $h^2_{FAM}$ <sup>7,12</sup>. Despite this,  $h^2_{SNP}$  estimates for most traits are still below  $h^2_{FAM}$ , with BMI a typical

## Running Head: Comparison of SNP heritability methods

68 example where  $h^2_{SNP} \sim 0.27$  while  $h^2_{FAM} \sim 0.4-0.6$  (ref. <sup>12</sup>). Thus, for many complex traits, including  
69 disease traits, much of the heritability remains unaccounted for.

70 A second application of these approaches is to better understand the genetic architecture  
71 of complex traits. Genetic architecture refers to the number, frequencies, effect sizes, and  
72 locations of causal variants (CVs) underlying trait variation. Methods for estimating heritability  
73 from SNPs have found that estimated genetic variance is proportional to chromosome length for  
74 numerous complex traits, including height, BMI, schizophrenia, depression, and metabolic traits,  
75 consistent with the hypothesis that these traits are influenced by hundreds to thousands of  
76 variants with small effects spread throughout the genome<sup>5,6,8,12-16</sup>. More recently, these methods  
77 have allowed insight into the frequency distribution and functional annotation of causal variants  
78 by partitioning SNPs into MAF bins and annotation categories<sup>17,18</sup>. Such methods have allowed  
79 insight into gene networks involved in complex traits<sup>19</sup>, and helped determine optimal strategies  
80 for large-scale genotyping, such as whether genotyped SNPs on commercial arrays with  
81 subsequent imputation can capture the genetic variation from all frequency classes of causal  
82 variants or if whole genome sequences instead are needed<sup>12</sup>.

83 A variety of methods to estimate  $h^2_{SNP}$  and partition the genetic variance among sets of  
84 markers have been developed for these purposes. Many of these methods use one or more  
85 genetic relatedness matrices (GRMs) to estimate variances using restricted maximum likelihood  
86 (GREML)<sup>6,12,17,20</sup>. Manipulations of the GRM via treelet covariance smoothing<sup>21</sup> or weighting by  
87 linkage disequilibrium (LD) tagging of SNPs<sup>13</sup> have also been proposed. A much different  
88 approach, LD-score regression, estimates  $h^2_{SNP}$  from GWAS summary statistics<sup>22</sup>. The  
89 performance of these methods has typically been evaluated via simulation by assuming that  
90 causal variants have the same properties, on average, as common SNPs found on commercial

## Running Head: Comparison of SNP heritability methods

91 genotyping arrays. However, such an approach is problematic because SNPs are specifically  
92 selected because they are common, have unusually high LD with untyped SNPs, or have been  
93 implicated in disease (e.g., the Affymetrix Axiom chip used in the UK Biobank<sup>23</sup>). SNPs on arrays  
94 are therefore probably not reflective of typical CVs across the genome, and thus the ability of  
95 these methods to estimate  $h^2_{\text{SNP}}$  or determine the genetic architecture of complex traits has not  
96 yet been properly assessed, nor have these methods been directly compared across conditions,  
97 such as levels of stratification or environmental confounding, that can cause biases. In particular,  
98 how the various methods perform with traits derived from very rare CVs may be quite different  
99 than how they perform on traits derived from common, well-tagged CVs, such as those used on  
100 SNP arrays.

101 Here, we utilize thousands of recently-sequenced whole genomes to simulate complex  
102 phenotypes to test the performance of the most widely used SNP heritability estimation methods.  
103 We examine each method's ability to estimate  $h^2_{\text{SNP}}$  while varying the amount of population  
104 stratification, the frequency distributions of causal variants, and the type of whole-genome data  
105 analyzed (SNP array, imputed, and sequence). By using real sequence data to simulate  
106 phenotypes, the genotypic data we use are highly realistic with respect to LD, allele frequency  
107 distributions (with minor allele frequencies down to  $3 \times 10^{-4}$ ), variant density, and other genomic  
108 properties found in real data. Finally, we use the best-performing methods to estimate  $h^2_{\text{SNP}}$  and  
109 examine genetic architecture for six complex traits using the UK Biobank. While  $h^2_{\text{SNP}}$  estimation  
110 following imputation can account for the majority of the heritability, larger sample sizes and  
111 reference panels, or novel methods, will be needed to fully account for all the additive genetic  
112 variance in complex traits involving very rare causal variants.

113

114

## 115 **MATERIALS AND METHODS.**

### 116 ***Samples and Population Structure***

117 We simulated continuous phenotypes derived from whole genome sequence (WGS) data  
118 in the Haplotype Reference Consortium (HRC) dataset. Full details of the HRC can be found in  
119 McCarthy et al.<sup>24</sup>. Briefly, this resource comprises roughly 32,500 individual whole genome  
120 sequences from multiple whole-genome sequencing studies, with phased genotype calls  
121 available at all sites with a minor allele count of at least 5. The HRC contains world-wide  
122 populations, but the majority are of European (EUR) origin. This large collection allowed us to  
123 simulate phenotypes with differing genomic architectures under realistic patterns of LD structure,  
124 stratification, and relatedness with the whole genomes. We obtained permission to access the  
125 following HRC cohorts (recruitment region & sample size): AMD (Europe & worldwide; 3,189),  
126 BIPOLAR (European ancestry; 2,487), GECCO (European ancestry; 1,112), GOT2D (Europe,  
127 2,709), HUNT (Norway; 1,023), SARDINIA (Sardinia; 3,445), TWINS (Minnesota; 1,325), 1000  
128 Genomes (worldwide; 2,495), UK10K (UK; 3,715) (see web resources for HRC information  
129 including specific cohorts). The subset of the HRC data we accessed totaled 21,500 whole  
130 genome sequences comprising 38,913,048 biallelic SNPs.

131 Our goal was to assess the bias and precision of various  $h^2_{SNP}$  estimation methods using  
132 data similar to that typically used in GWAS and  $h^2_{SNP}$  analyses. In order to mimic this kind of  
133 data, we first extracted variant positions corresponding to a widely-used commercially available  
134 genotyping array, the UKBiobank Affymetrix Axiom array. We performed principal components  
135 analysis using flashpca<sup>25</sup> on 133,603 SNPs after LD and MAF pruning (plink2<sup>26</sup> commands `-maf`  
136 `0.05 --indep-pairwise 1000 400 0.2`), extracting the first ten PCs, and performing K-means

## Running Head: Comparison of SNP heritability methods

137 clustering in  $R^{27}$ . We used the 1000 Genomes individuals in the HRC as anchor points for  
138 ancestry and identified 19,478 individuals of European descent, including individuals of Finnish  
139 and Sardinian ancestry (Figure S1).

140 To identify subsets of these 19,478 individuals spanning different levels of genetic  
141 heterogeneity, we reran PCA with only these individuals, then proceeded to identify four  
142 increasingly homogenous subgroups within them using K-means clustering (Fig. 1). The most  
143 stratified group contained all EUR samples (N=19,478). The somewhat stratified group excluded  
144 Sardinian and Finnish samples (N=14,424). The low stratification group contained only  
145 northern/western European samples (N=11,243), and the least stratified (homogeneous) group  
146 was a subset of British ancestry samples (N=8,506). We used GCTA<sup>20</sup> to estimate relatedness  
147 and remove samples so that the maximum relatedness was 0.1 within each of the four samples.  
148 In the most homogeneous (smallest) sample, this left 8,201 individuals. To avoid confounding  
149 sample size with degree of stratification, we randomly chose 8,201 of the unrelated individuals  
150 from within each of the other three more stratified subsamples. Our purpose in identifying these  
151 groups was to vary the amount of genetic heterogeneity within a sample, similar to what might be  
152 found across a range of different GWAS samples, rather than formal population assignment or  
153 classification of individuals. We also identified individuals with relatedness less than 0.05 within  
154 each group, and used both subsets to examine how a 0.1 or 0.05 relatedness cutoff influences  
155  $h^2_{SNP}$  estimates. Sample sizes when using the 0.05 relatedness cutoff were 7792, 8115, 8129,  
156 and 8186 for the four genetic structure subsamples.

157

158 ***Simulated Phenotypes Using Whole Genome Sequencing Data***

## Running Head: Comparison of SNP heritability methods

159 To assess how methods performed on a range of genetic architectures, we simulated  
160 phenotypes from CVs drawn randomly from five MAF ranges from the whole genome sequence  
161 data: common ( $MAF \geq 0.05$ ), uncommon ( $0.01 \leq MAF < 0.05$ ), rare ( $0.0025 \leq MAF < 0.01$ ), very rare  
162 ( $0.0003 \leq MAF < 0.0025$ ), and all variants that had a minor allele count (MAC) of at least 5  
163 ( $MAF \geq 0.0003$ ) (Fig. S2). Phenotypes were generated from 1,000 CVs from the model  $y_i = g_i + e_i$ ,  
164 where  $g_i = \sum w_{ik} \beta_k$ ,  $w_{ik}$  is the genotype (coded as 0, 1, or 2) of individual  $i$  at the  $k^{th}$  CV, and  $\beta_k$  is  
165 the  $k^{th}$  allelic effect size, drawn from  $\sim N(0, 1/[2p_k(1-p_k)])$ , where  $p_k$  is the MAF of allele  $k$  within a  
166 population subset. This model therefore assumes larger average additive effect sizes for rarer  
167 variants. The  $g_i$ 's were standardized and added to residual error drawn from  $\sim N(0, (1-h^2)/h^2)$  for  
168 a  $h^2$  of 0.5 for simulated phenotypes. A total of 100 repetitions were simulated for phenotypes  
169 derived from each CV MAF range and for each of the four population stratification subsets. It is  
170 important to note that we did not simulate any phenotypic effects as a function of ancestry within  
171 any of the subsamples, and thus biases related to stratification in our results were due to the  
172 genotypic (e.g., long-range LD), not phenotypic, effects of stratification.

173

### 174 **SNPs, WGS, and Imputed Variants**

175 Most marker heritability studies utilize commonly available commercial arrays, and  
176 estimates of  $h^2_{SNP}$  reflect how well SNPs on these arrays tag CVs. In particular, CVs with low  
177 MAF or that exist in regions of low LD are typically tagged poorly by SNP arrays<sup>6,13</sup> and  $h^2_{SNP} <$   
178  $h^2$  in these situations. Alternatively, as large WGS reference panels (e.g., 1KG, UK10K, HRC)  
179 become increasingly available, imputing genome-wide variants based on SNP arrays is an  
180 attractive option for capturing more and rarer genetic variants than possible on arrays, although  
181 imputation accuracy declines with MAF<sup>12</sup>. Finally, using WGS data to estimate GRMs should



## Running Head: Comparison of SNP heritability methods

182 reflect relatedness at all CVs, including those that are rare or in low LD with other SNPs.  
183 Although WGS data in phenotyped samples is not yet widely available at the sample sizes  
184 required for precise estimation of  $h^2_{SNP}$ , we include it as a benchmark for results based on array  
185 and imputed data and because large WGS samples are likely to become increasingly available  
186 in the future. We therefore tested each of these data types (array, imputed, and WGS variants)  
187 using each of the methods described below to determine how much of the heritability can be  
188 captured from each data type, and how closely results from imputed data mimic those from WGS  
189 data.

190 From the HRC sequence data (the WGS dataset), we extracted positions corresponding  
191 to the Axiom array as noted above (the array SNP dataset) with  $MAF > 0.01$ . To impute, we used  
192 the 8,201 unrelated individuals in each population stratification set and added their close  
193 relatives (relatedness  $> 0.1$ ) back into the sample as described below in the GREML-SC method  
194 description. We added these close relatives back in to the target imputation set in order to a)  
195 remove close relatives from the reference panel which would artificially increase imputation  
196 accuracy, and b) because some of the methods described below require the use of closely  
197 related individuals. We phased these individuals using SHAPEIT2<sup>28</sup>, imputed using minimac3<sup>29</sup>,  
198 and retained variants with imputation  $R^2 \geq 0.3$  (ref. <sup>12</sup>). We used the HRC sequence data as our  
199 imputation reference panel after removing all target (8201 unrelated + relatives) individuals,  
200 thereby assuring ~independence (no relatedness) between the target and reference panels.  
201 Final reference panel sizes for the four structure subsamples were 11,584; 12,799; 12,785; and  
202 12,994. Reducing the sample size of the reference panel likely resulted in poorer imputation than  
203 had we used the full HRC panel but was nevertheless substantially larger than reference panels  
204 used in most past imputation procedures (e.g., 1,000 Genomes). Moreover, because the target

## Running Head: Comparison of SNP heritability methods

205 and reference samples were from the same populations and the same cohorts, the imputation  
206 quality is likely higher than most GWAS samples would obtain. However, given that the HRC has  
207 become a widely-used imputation reference panel, our imputation quality is probably roughly  
208 reflective of imputation quality using modern procedures.

209 The amount of tagging throughout the genome differs between the various commercial  
210 arrays<sup>12</sup>, and these differences may lead to differing  $h^2_{SNP}$  estimates. To assess this, for the  
211 GREML-SC and GREML-MS methods (see below) using array positions data, we compared  
212 results from the Axiom array to those from the Illumina Omni2.5 array. For reference, MAF  
213 distributions of the different data types for two of the structure subsamples are shown in Figure  
214 S2.

215

### 216 ***Heritability Estimation Methods Tested***

217 Numerous methods have recently been developed to estimate  $h^2_{SNP}$  and partition genetic  
218 variance using genomic data. Among these, we compared the most widely used, including the  
219 various single and multiple component GREML approaches implemented in the GCTA  
220 software<sup>6,12,17</sup>, approaches that specifically take into account how LD influences the tagging of  
221 nearby sites by SNPs<sup>13</sup>, those that use related and unrelated samples to account for rare and  
222 common variant effects<sup>8</sup>, those that denoise the GRM using treelet covariance smoothing<sup>21</sup>,  
223 those that relate the effect sizes of SNPs from a GWAS to their degree of LD tagging<sup>19,22</sup>, and  
224 computationally efficient mixed model approaches<sup>18</sup>. Here, we briefly describe our  
225 implementation of each of these methods; for additional information on the methods themselves,  
226 see the above references. For all methods except LD-Score Regression and BOLT-REML  
227 (described below), we generated GRMs following the procedures of each method, and estimated

## Running Head: Comparison of SNP heritability methods

228  $h^2_{SNP}$  using GCTA<sup>20</sup>. In all models, variance component estimates were unconstrained (e.g., by  
229 using the `-reml-no-constrain` option of GCTA), and included 20 PCs (10 from worldwide PCA  
230 and 10 from the specific subsample PCA) as continuous covariates and sequencing cohort as a  
231 categorical covariate.

232

### 233 **Single Component GREML (GREML-SC)**

234 Yang et al.<sup>6</sup> introduced the single component GRM approach using a mixed-effects  
235 model, with GRM entries:

$$236 \quad A_{ij} = \frac{1}{m} \sum_k \frac{(x_{ik} - 2p_k)(x_{jk} - 2p_k)}{2p_k(1-p_k)} \quad (1)$$

237 where  $m$  is the number of SNPs,  $x_{jk}$  is the genotype (coded as 0, 1, or 2) of individual  $j$  at the  $k^{th}$   
238 locus, and  $p_k$  is the MAF of the  $k^{th}$  locus. The variance of the phenotypes is

$$239 \quad \text{var}(\mathbf{y}) = \mathbf{A}\sigma_v^2 + \mathbf{I}\sigma_e^2 \quad (2)$$

240 where the variance explained by the SNPs ( $\sigma_v^2$ ) and error variance ( $\sigma_e^2$ ) are estimated using  
241 restricted maximum likelihood (REML) implemented in the GCTA package<sup>20</sup>. The proportion of  
242 the total variance explained by all SNPs is then a measure of heritability ( $h^2_{SNP} = \sigma_v^2 / (\sigma_v^2 +$   
243  $\sigma_e^2)$ ). Typically, the set of  $m$  SNPs used to build the GRM is the set of SNPs with  $MAF \geq 0.01$   
244 (hereafter “common SNPs”) and unrelated individuals (relatedness  $\leq 0.05$ ). Because the Axiom  
245 array contains some rare markers, we compared this approach to one using all SNPs with  
246  $MAC \geq 5$  (hereafter “all SNPs”) in each particular stratification subsample, as well as to an  
247 approach using less stringent relatedness thresholds (relatedness  $< 0.10$  and no relatedness  
248 threshold). For analyses that used no relatedness threshold, inclusion of close relatives

## Running Head: Comparison of SNP heritability methods

249 increased our sample sizes to 9916, 8701, 8715, and 8506 for the samples with most, some,  
250 low, and least stratification, respectively (Fig. 1).

251

### 252 **MAF-Stratified GREML (GREML-MS)**

253 Biased estimates of  $h^2_{SNP}$  are expected when using the GREML-SC method if the MAF  
254 distribution of the CVs does not match the MAF distribution of SNPs used to generate the  
255 GRM<sup>17</sup>. Stratifying variants into MAF classes and using a multiple GRM GREML approach can  
256 mitigate this bias and can also partition the genetic variance into that explained by different MAF  
257 categories of SNPs, lending insight into the genetic architecture of complex traits<sup>12,30</sup>. We applied  
258 this approach using 4 MAF categories, matching the CV MAF categories used for phenotype  
259 simulation.

260

### 261 **LD- and MAF-Stratified GREML (GREML-LDMS)**

262 Extending the GREML-MS method to account for different levels of LD throughout the  
263 genome, Yang et al.<sup>12</sup> introduced an LD score-stratified method to the GREML-MS approach.  
264 GREML-LDMS stratifies variants according to both MAF categories as well as an LD-score,  
265 defined as the sum of  $r^2$  between the focal variant and all other variants in a window. We  
266 estimated LD scores using the default settings in GCTA (10Mb block size with a 5Mb overlap),  
267 and stratified variants into LD score quartiles. Combined with the four MAF categories above, we  
268 used 16 GRMs for this approach.

269

### 270 **Single Component and MAF-Stratified LD-Adjusted Kinships (LDAK-SC and LDAK-MS)**

## Running Head: Comparison of SNP heritability methods

271 Speed et al.<sup>13</sup> noted that because LD varies across the genome, CVs in regions of high  
272 LD are given disproportionate weight by eqn. (1) above. They proposed a method to weight  
273 SNPs according to local LD, which potentially corrects for the bias introduced when there is  
274 variation in how well CVs are tagged by SNPs. We used LDAK5<sup>13</sup> to estimate these LD-weighted  
275 GRMs. This approach thins SNPs in very high LD first to reduce redundant tagging, then  
276 estimates SNP weights that are inversely proportional to their average LD with other SNPs. We  
277 also applied the MAF-stratified approach described above with the LDAK method (LDAK-MS).  
278 For the single component model (LDAK-SC), we used all SNPs ( $MAC \geq 5$ ) as well as only  
279 common SNPs ( $MAF \geq 0.01$ ) to build the GRM. For the MAF-stratified approach, following  
280 recommendations in the LDAK documentation, we estimated variant weights over the union of all  
281 variants ( $MAC \geq 5$ ), then computed GRMs for each MAF class separately. We then applied the  
282 multiple GRM method with these LDAK-weighted GRMs to estimate  $h^2_{SNP}$  using GCTA.

283

### 284 **Extended Genealogy with Thresholded GRMs**

285 Zaitlen et al.<sup>8</sup> introduced a method to simultaneously estimate the full narrow-sense  
286 heritability (incorporating the effects of poorly tagged SNPs) and  $h^2_{SNP}$  using two GRMs in a  
287 sample containing close relatives. The first GRM contains relatedness from SNPs for all  
288 individuals while relatedness estimates below a threshold,  $t$ , are set to 0 in the second GRM. The  
289 first GRM, therefore, contains information on allele sharing of (mostly common) variants in  
290 unrelated and related individuals and is used to estimate  $h^2_{SNP}$ , while the second only contains  
291 information from closely related individuals, presumably reflecting sharing of both common and  
292 rare CVs, and provides an estimate of what we call  $h^2_{IBS>t}$ , (following Zaitlen et al.<sup>8</sup>). The sum of  
293  $h^2_{IBS>t}$  and  $h^2_{SNP}$  should therefore provide an estimate of total  $h^2$ , similar to  $h^2_{FAM}$ , with all the

## Running Head: Comparison of SNP heritability methods

294 same potential biases that exist in  $h^2_{FAM}$  estimates from designs that use close relatives. We  
295 tested two relatedness thresholds ( $t \leq 0.05$  and  $0.1$ ) for the second GRM. By necessity, all  
296 analyses using the relatedness thresholded GRM approach included close relatives.

297

### 298 **Treelet Covariance Smoothing (TCS)**

299       Crossett et al.<sup>21</sup> noted that the GRM estimates (particularly for unrelated individuals) are  
300 inherently noisy. They proposed a method to smooth the estimates using treelet covariance  
301 smoothing (TCS) to obtain more accurate estimates of relatedness. Their method takes  
302 advantage of the hierarchical nature of relatedness in samples to obtain better estimates of  $A_{ij}$   
303 among unrelated individuals. We replicated their methods, using common SNPs ( $MAF \geq 0.01$ ) and  
304 including related individuals, and implemented the TCS method in the *treelet* R package<sup>31</sup>. TCS  
305 requires identifying a smoothing parameter,  $\lambda$  (distinct from the genomic control inflation factor  
306  $\lambda_{GC}$ ). Crossett et al.<sup>21</sup> propose two methods to optimize  $\lambda$ , one based on minimizing the GREML  
307 likelihood and one based on minimizing a loss function ( $H(\lambda)$ ) at different levels of  $\lambda$  based on  
308 subsamples of the SNPs. With the large number of simulations across stratification subsamples  
309 and genetic architectures, minimizing the GREML likelihood for each simulated phenotype was  
310 not feasible. Minimizing  $H(\lambda)$  using the second approach requires estimating the GRM and  
311 applying the TCS method to over 50 subsets of data, also impractical computationally with over  
312 8,000 individuals. We therefore used a modification of the 2<sup>nd</sup> approach. We built GRMs from  
313 2000 randomly chosen individuals from each stratification subsample and optimized  $\lambda$  for each  
314 subsample following the published methodology (Fig. S3), then applied the optimal  $\lambda$  to the full  
315 GRM of over 8,000 individuals.

316

## 317 **LD-Score Regression**

318 LD-score regression uses a different approach to estimating  $h^2_{SNP}$ . Rather than estimating  
319 relatedness within a sample for use in mixed-model GREML analysis, LD-score regression  
320 regresses GWAS test statistics ( $\chi^2$ ) on SNPs' LD scores, which reflect the degree to which each  
321 SNP is correlated with surrounding SNPs<sup>19,22</sup>. For a polygenic model, the expected GWAS test  
322 statistic of variant  $j$ ,  $\chi^2_j$ , is

323

$$324 \quad E[\chi^2_j | l_j] = N(h^2_{SNP})l_j / M + Na + 1 \quad (3)$$

325

326 where  $N$  is the sample size,  $M$  is the number of SNPs,  $l_j$  is the LD score ( $= \sum_k r^2_{jk}$ ) measuring the  
327 tagging of surrounding variants by SNP  $j$ , and  $a$  is a measure of confounding biases arising from  
328 stratification and cryptic relatedness. Thus, regressing GWAS test statistics on per-variant LD  
329 scores allows for both estimation of  $h^2_{SNP}$  and assessing the degree of confounding or  
330 polygenicity of a trait<sup>22</sup>. Bulik-Sullivan et al.<sup>22</sup> argue that LD-score regression provides unbiased  
331 estimates of  $h^2_{SNP}$  regardless of whether GWAS test statistics are estimated with or without  
332 controlling for ancestry or environmental covariates or relatedness. Here, we estimated GWAS  
333 test statistics using plink2 without controlling for ancestry covariates, controlling for ancestry  
334 covariates (20 PCs and sequencing cohort as above), and controlling for ancestry covariates as  
335 fixed effects in a mixed model that included a kinship matrix. For the latter, we applied the GCTA  
336 leave-one-chromosome-out (LOCO) approach<sup>32</sup>; because the GCTA-LOCO approach is  
337 computationally intensive, we ran only 20 repetitions of each phenotype rather than 100, and did  
338 so only for the array SNP dataset. We used the *ldsc* package with default parameters (see  
339 URLs) to perform LD score regression. We calculated LD scores for all variants using the whole

## Running Head: Comparison of SNP heritability methods

340 genome sequence data, including common and rare variants. As recommended by Bulik-Sullivan  
341 et al.<sup>22</sup>, we used unrelated individuals (relatedness  $\leq 0.05$ ) and only common variants to perform  
342 the LD score regression itself, because the relationship between the GWAS  $\chi^2$  and LD-score is  
343 unclear for rare (MAF $<.01$ ) SNPs.

344 LD score regression can also be used to partition heritability among annotations<sup>19</sup>. We  
345 applied this approach using the four MAF categories described above. Because our MAF  
346 categories included very rare variants, for this MAF-stratified LD score regression, we used  
347 GWAS test statistics from all variants (MAF $\geq 0.0003$ , using the --not-5-50 flag in the ldsc  
348 package) while controlling for covariates as above.

349

### 350 **BOLT-REML**

351 Unlike other GREML approaches, BOLT-REML uses a Monte Carlo approximation of the  
352 gradient for the likelihood function to reduce computation time and memory requirements in  
353 variance component estimation<sup>18</sup>. When using whole genome sequence and imputed variant  
354 data with  $>14$ M variants (see below), time required by BOLT-REML, even when highly  
355 parallelized, was prohibitive for 100 repetitions of each combination of variables we tested, as it  
356 scales with  $MN^{1.5}$ , where M is the number of markers and N is the number of samples (see  
357 Supplementary Table 1 of Loh et al.<sup>18</sup> for computational performance). Note that GREML takes  
358 longer for a single sample due to the length of time to create the GRM; in our simulations with  
359 GCTA-style approaches, the GRM computation was done only once, and therefore was much  
360 faster when estimating heritability for many repetitions created from randomly-drawn CVs with a  
361 single GRM. We therefore only applied BOLT-REML to the array dataset. We applied the  
362 method with a single component using either all array positions or only common markers



Running Head: Comparison of SNP heritability methods

363 (MAF>0.01) as well as a MAF-stratified approach with the same four MAF partitions and same  
364 covariates described above.

365

### 366 **Confounding between relatedness and shared environments**

367 Many of the methods we tested use unrelated individuals to avoid the assumption of no  
368 shared environmental effect among near relatives<sup>6</sup>. However, several, such as the extended  
369 genealogy with thresholding, require the use of near relatives. This could lead to confounding  
370 between relatedness estimates and shared environmental effects within families or closely  
371 related individuals if shared environmental effects are not modeled<sup>7,33</sup>. Indeed, Zaitlen et al.<sup>8</sup>  
372 argue that such shared environmental effects were the likely cause of higher  $h^2_{FAM}$  estimates  
373 among relatives who shared an environment through cohabitation (e.g., half-siblings) compared  
374 to equally related relatives that did not share a cohabitation environment (e.g., grand-parents  
375 and grand-children). We therefore assessed whether  $h^2_{SNP}$  and  $h^2_{FAM}$  estimates are biased for  
376 methods that use closely related individuals when extended shared environmental effects are  
377 present but unmodeled.

378 We first identified all groups of individuals connected by at least one pairwise relatedness  
379 value > 0.2 ("extended families"). Note that many of the pairwise relationships within these  
380 extended families were below 0.2. For example, spouses are typically unrelated but are  
381 nevertheless defined as being in the same family if their offspring are present, and cousins would  
382 be defined as being in the same family if their parents were present in the sample. We then  
383 simulated phenotypes with a shared extended family environmental effect that accounted for  
384 10% of the variance ( $c^2=0.1$ ). Simulations were similar to those described above, with genotypic  
385 values exactly the same as above, but with shared effects for each family drawn from  $\sim N(0, V_c)$ ,

## Running Head: Comparison of SNP heritability methods

386 where  $V_c = c^2 * V_g / h^2$ ,  $V_g$  is the variance of genetic values, and  $c^2$  is the proportion of the  
387 phenotypic variance due to shared environments, and residual error added as  $\sim N(0, (1 - h^2 -$   
388  $c^2) * V_g / h^2)$ , for a simulated  $h^2=0.5$ ,  $c^2=0.1$ , and  $e^2=0.4$ . We applied GREML-SC, LD score  
389 regression, and extended genealogy with thresholded GRMs using common variants from array  
390 SNPs controlling for the same covariates as above and without modeling the shared  
391 environmental effect. This tested whether methods are robust to violations of the assumption of  
392 no shared environmental effects on the phenotype.

393

### 394 ***Heritability of Complex Traits in the UK Biobank***

395 We estimated  $h^2_{SNP}$  for six continuous phenotypes in the UK Biobank using the methods  
396 (GREML-MS and GREML-LDMS) that produced consistently unbiased estimates of  $h^2$  and  
397 partitioned the genetic variance most accurately in the simulations above. The UK Biobank is a  
398 large, publicly available resource of ~500,000 UK adults, with deep phenotyping, family history,  
399 and genotype data<sup>23</sup>. The current release includes ~150,000 individuals, primarily of European  
400 ancestry, genotyped on the Affymetrix Axiom platform, phased using SHAPEIT2 and imputed to  
401 a combined 1000 Genomes and UK10K reference panel (N=6,285 individuals). The details of the  
402 official UK Biobank genotyping and imputation methods in the released data can be found at  
403 [http://biobank.ctsu.ox.ac.uk/crystal/docs/genotyping\\_qc.pdf](http://biobank.ctsu.ox.ac.uk/crystal/docs/genotyping_qc.pdf) and  
404 [http://biobank.ctsu.ox.ac.uk/crystal/docs/impute\\_ukb\\_v1.pdf](http://biobank.ctsu.ox.ac.uk/crystal/docs/impute_ukb_v1.pdf) (accessed 29 Feb. 2016). We  
405 excluded individuals with no genetic data and those whose self-reported and genetic sex  
406 conflicted (data fields f.31.0.0 and f.22001.0.0). Poor quality samples identified by the UK  
407 Biobank and Affymetrix were also removed (f.220010.0.0) as were UKBiLEVE poor-quality  
408 samples (f.22051.0.0), leaving a total of 151,661 individuals. To reduce population stratification,

## Running Head: Comparison of SNP heritability methods

409 we included only individuals of European ancestry in our analyses. The UK Biobank identified  
410 self-reported “British” individuals as “Caucasian” based on grouping of individuals with CEU  
411 individuals in PCA (see UK Biobank documentation). To these individuals (f.22006.0.0), we  
412 added those who self-identified as “White,” “Irish,” or “Any other white background” whose PC  
413 scores on the first four axes (f.22009.0.1-4) were within the range of the UK Biobank-identified  
414 “Caucasian” individuals, resulting in 126,338 individuals. We projected the UK Biobank samples  
415 onto the HRC PCA axes using the loadings from the HRC EUR individuals, demonstrating that  
416 the UK Biobank individuals we used in the analyses below are similar to the least stratified or  
417 unstratified subsamples of the HRC we used (Fig. 1). To estimate the GRMs, we separately  
418 used directly genotyped Axiom array positions as well as imputed genome-wide variants with  
419 IMPUTE info score  $\geq 0.3$ .

420 We estimated  $h^2_{SNP}$  for the following traits in the UK Biobank (field ID number): height  
421 (f.50.0.0), body mass index (BMI; f.21001.0.0), whole-body impedance (f.23127.0.0), trunk fat  
422 percentage (f.23127.0.0), fluid intelligence (f.20016.0.0), and neuroticism (f.20127.0.0). We  
423 normalized phenotypes and removed observations greater than 5 standard deviations away from  
424 the mean. We included sex (f.31.0.0), UK Biobank assessment centre (f.54.0.0), genotype  
425 measurement batch (f.22000.0.0), and educational attainment (“qualification”, f.6138.0.0) as  
426 categorical covariates, and the Townsend deprivation index (f.189.0.0), age at assessment  
427 (f.21003.0.0), age at assessment squared, and the 15 PC scores from the UK Biobank  
428 (f.22009.0.1-15) as quantitative covariates.

429 For GREML-MS, we binned variants into eight MAF-categories:  $MAC \geq 5$  &  $MAF < 0.0001$ ,  
430  $0.0001-0.001$ ,  $0.001-0.01$ ,  $0.01-0.1$ ,  $0.1-0.2$ ,  $0.2-0.3$ ,  $0.3-0.4$ , &  $0.4-0.5$ . For GREML-LMDS, we  
431 were limited in the number of predictor GRMs to use due to computational constraints (1Tb of

Running Head: Comparison of SNP heritability methods

432 RAM); we therefore, used 4 MAF bins (common:  $MAF > 0.05$ , uncommon:  $0.01 < MAF < 0.05$ , rare:  
433  $0.0001 < MAF < 0.01$ , and very rare:  $MAC > 5$  &  $MAF < 0.0001$ ) and 2 LD-score bins (above and  
434 below the median LD-score).

435

## 436 **RESULTS**

### 437 ***Simulation Results***

438 We found clear differences across methods, degree of stratification, and data types (array  
439 SNP, WGS, or imputed variants) in their ability to estimate the simulated  $h^2$  for different CV MAF  
440 architectures (Figs. 2-3 and S4-S6, Tables S1-S3). Below, we describe results for each method  
441 in detail. Please refer to Figures 2-4, Figures S4-S6, and Tables S1-S5 for estimates of  
442 heritability, and Figures S7-S9 for estimates of the heritability standard errors.

443

### 444 **Single Component GREML (GREML-SC)**

445 Estimates of  $h^2_{SNP}$  using GREML-SC were highly sensitive to the CV allele frequencies,  
446 dataset type (SNPs, WGS, or imputed variants), level of stratification, and MAF cutoff for SNPs  
447 used to build the GRM. Using only Axiom array positions,  $h^2_{SNP}$  was overestimated by ~20% for  
448 common CV phenotypes, and progressively underestimated with rarer CVs, regardless of  
449 whether all or just common ( $MAF > 0.01$ ) SNPs were used to build the GRM. The underestimation  
450 of  $h^2_{SNP}$  when the GRM is built from SNPs that are more common on average than the CVs is  
451 well known<sup>6</sup>. It is due to a more general principle: when the average LD between CVs and the  
452 markers used to build the GRM is lower than the average LD among the markers themselves,  
453  $h^2_{SNP}$  is underestimated<sup>12</sup>. Thus,  $h^2_{SNP}$  was underestimated for rare CVs because they tend to  
454 have lower LD with common markers than the common markers have with each other.

Running Head: Comparison of SNP heritability methods

455       The overestimation of  $h^2_{SNP}$  for common CVs in our results is explained by the same  
456 principle—the average LD between CVs and markers is, in this case, higher than the average LD  
457 among markers used to build the GRM. This occurs for two reasons. First, the common CVs  
458 (MAF $\geq$ 0.05) have higher MAF on average than the markers on the array (using either an  
459 MAF $\geq$ 0.01 or MAC $\geq$ 5 cutoff for the Axiom-based GRM computation). Second, markers on arrays  
460 are not chosen at random, but are typically chosen to minimally tag one another (to reduce  
461 redundancy) and to maximally tag variants not on the array, leading to lower average LD among  
462 markers than between markers and common variants not on the array (see also ref. <sup>13</sup>). To  
463 understand if the overestimation of  $h^2_{SNP}$  for common CV phenotypes was unique to the Axiom  
464 array positions, we reran the analysis with SNPs on the Illumina Omni2.5 array and observed  
465 similar  $h^2_{SNP}$  inflations for common CVs on the Illumina array as well, although the impact of  
466 sample stratification appeared to more strongly influence the Illumina chip, perhaps due to the  
467 incorporation of a larger number of rare (MAF $<$ 0.01) variants on the Illumina array (Figs. S2 and  
468 S10).

469       Utilizing imputed or WGS data to build the GRMs resulted in complex patterns of  $h^2_{SNP}$   
470 estimates depending on CV MAF class and stratification. Using a MAF $>$ 0.01 cutoff for imputed  
471 SNPs in building the GRM resulted in patterns similar to array-based estimates above (Fig. S5-  
472 S6), although the overestimates for common CVs were not as large, probably because the  
473 imputed markers used to build the GRM included all common SNPs rather than an  
474 overrepresentation of tag SNPs. On the other hand, when all imputed markers were used to  
475 build the GRM, GREML-SC estimates depended strongly on stratification level and the CV MAF.  
476 GREML-SC produced large overestimates for common CV phenotypes but underestimates for  
477 rarer CV phenotypes in unstratified samples (Fig. S6), as previously noted in Yang et al.<sup>12</sup>. The

## Running Head: Comparison of SNP heritability methods

478 pattern was reversed for stratified samples: estimates of  $h^2_{SNP}$  were approximately unbiased for  
479 common CV phenotypes but underestimated for uncommon-to-rare CV phenotypes and  
480 overestimated for very rare CV phenotypes. Finally, when the frequency distribution of the CVs  
481 matched that of the WGS (e.g., randomly drawn from all WGS variants), the estimates were  
482 unbiased regardless of stratification when using WGS data to build the GRM (Fig. S5), but were  
483 slightly underestimated when using imputed data (Fig. S6), presumably due to imperfect  
484 imputation. The reason for this complex pattern of  $h^2_{SNP}$  estimates, where the effect of CV MAF  
485 depended on stratification, was likely due to changes in CV-marker and marker-marker LD as a  
486 function of stratification. The pattern of  $h^2_{SNP}$  estimates in unstratified samples is predictable  
487 based on the logic outlined above: when CVs are more common than the markers used to build  
488 the GRM,  $h^2_{SNP}$  is over-estimated, and vice-versa when CVs are less common than SNPs used  
489 to build the GRM. In highly stratified samples, however, very rare variants tend to be ancestry-  
490 specific and therefore weak proxies for variants elsewhere in the genome that predict ancestry  
491 (long-range LD). This makes the LD between very rare CVs and markers that predict ancestry  
492 elsewhere in the genome higher on average than the LD among the markers used to build the  
493 GRM, thereby inflating  $h^2_{SNP}$  estimates for very rare CV phenotypes in stratified samples.

494         These results underscore that  $h^2_{SNP}$  estimates from GREML-SC, the typical approach  
495 used, are sensitive to differences in average CV-marker LD vs. marker-marker LD (Fig. S11).  
496 This difference itself depends on complex interplays between the CV MAF distribution, the  
497 frequency distribution of markers used to build the GRM, and the level of stratification in the  
498 sample. Thus,  $h^2_{SNP}$  estimates using single-component GREML are highly context dependent,  
499 which may help explain the variation in estimates sometimes observed across studies for the

500 same traits. Fortunately, stratifying SNPs based on MAF and LD, to which we turn next, largely  
501 ameliorates these issues.

502

### 503 **GREML using MAF-Stratified (GREML-MS) and LD- and MAF-Stratified (GREML-LDMS)**

#### 504 **GRMs**

505 Genome partitioning using GREML-MS and GREML-LDMS produced  $h^2_{SNP}$  estimates that  
506 were substantially less biased and less sensitive to stratification than those from GREML-SC.  
507 GREML-MS  $h^2_{SNP}$  from array-based GRMs were underestimated for rarer CV phenotypes, as  
508 expected given the lack of LD between common array SNPs and rarer CVs, and were very  
509 slightly overestimated for common CV phenotypes, probably because of the LD properties of the  
510 SNPs chosen to be on the array (e.g., Illumina vs. Axiom positions, Fig. S10), as described in the  
511 previous section. GREML-MS using imputed variants slightly underestimated  $h^2_{SNP}$  for common  
512 to rare CV phenotypes. For very rare CV phenotypes,  $h^2_{SNP}$  was underestimated by ~18% in  
513 unstratified samples, likely due to poorer imputation quality for very rare SNPs, but  
514 underestimated by only ~7% in stratified samples. The higher estimates in stratified samples for  
515 very rare CVs is probably a lingering overestimation effect of long-range tagging of such variants  
516 in stratified samples. WGS-based estimates appeared unbiased for all combinations of CV MAF,  
517 relatedness, and stratification, with estimates all ~0.5.

518 Partitioning of the variance among the four MAF-stratified GRMs using GREML-MS  
519 allowed examination of the CV frequency distributions (Fig. S12, Table S4). GREML-MS  
520 estimated from GRMs built from array markers correctly apportioned the variation for common  
521 CV phenotypes, but as expected progressively underestimated  $h^2_{SNP}$  due to poor tagging of rare  
522 CVs with common SNPs (Fig. S12). Imputed variant GREML-MS provided more accurate

## Running Head: Comparison of SNP heritability methods

523 estimates of the CV frequency distributions, but still underestimated the effects of rare and very  
524 rare CVs by as much as ~20% in unstratified samples (Fig. 3). Using WGS, the appropriate  
525 proportion of the variance explained by each MAF-stratified GRM in the model was recovered  
526 (Fig. S13, Table S4). Thus, the use of multiple GRMs based on MAF using imputed or WGS data  
527 produces generally accurate GREML estimates of both  $h^2_{SNP}$  and the CV frequency distribution,  
528 with only modest downward biases for very rare CVs when using imputed data.

529         The patterns of  $h^2_{SNP}$  estimates (Fig. 2-3, Figs. S12, S13) from GREML-LDMS were  
530 almost identical to those from GREML-MS, which might be expected because the CVs in our  
531 simulation were drawn at random within frequency bins and without regard to their LD. There  
532 were, however, two minor differences between the GREML-LDMS and GREML-MS results. First,  
533 for array-based GRMs (Fig. 2), estimates from GREML-LDMS for common CV phenotypes were  
534 unbiased, whereas those for GREML-MS were slightly overestimated. As noted above, array  
535 markers are more likely to tag common SNPs not on the array better than those on the array,  
536 leading to higher CV-marker than marker-marker LD and creating a slight upward bias. By  
537 binning by LD in addition to MAF, GREML-LDMS removes this source of bias, leading to  
538 unbiased  $h^2_{SNP}$  estimates for common CVs. Second, for unknown reasons, GREML-LDMS using  
539 whole genome sequence data gave slight (~3%) underestimates of  $h^2_{SNP}$  in highly stratified  
540 samples for rare to common CVs, but not for very rare CVs (Fig. 2 and S5). This effect was not  
541 apparent in imputed data, and may be simply sampling variance.

542         In summary, our findings suggest that using GREML-MS or GREML-LDMS on imputed  
543 data generally leads to accurate estimates of  $h^2_{SNP}$  and the CV allele frequency distributions,  
544 with only modest underestimation of variance due to rare and very rare CVs. Moreover, once  
545 large enough WGS datasets become available, the underestimation of rarer CVs should be



546 largely ameliorated, although these methods can never estimate variance due to CVs that are so  
547 rare as to be unshared in a given sample.

548

### 549 **Single Component and MAF-Stratified LD-Adjusted Kinships (LDAK-SC and LDAK-MS)**

550 Single component LD-adjusted estimates of the kinship matrix (LDAK-SC) downweights  
551 markers that better tag other SNPs, thereby correcting for the overestimation of  $h^2_{SNP}$  observed  
552 in GREML-SC for common CV phenotypes in array-based data due to redundant tagging (Fig.  
553 2). As with other methods using GRMs based on array SNPs, LDAK-SC produced downwardly  
554 biased  $h^2_{SNP}$  estimates for rarer CV phenotypes. Using the MAF-stratified approach (LDAK-MS)  
555 resulted in similar patterns.

556 As with GREML-SC, using LDAK-SC on imputed data resulted in a complex set of biases  
557 that depended on CV MAF, data type, and stratification, although the patterns of bias were  
558 different. LDAK-SC  $h^2_{SNP}$  estimates using only common (MAF > 0.01) imputed variants were  
559 similar to those using only array SNP positions. LDAK-SC using all imputed variants led to  
560 roughly unbiased  $h^2_{SNP}$  estimates in unstratified samples, but led to  $h^2_{SNP}$  estimates that varied  
561 wildly depending on the CV MAF in the stratified samples (Fig. 2). LDAK-MS on imputed variants  
562 produced  $h^2_{SNP}$  estimates that were less biased than LDAK-SC, but nevertheless more biased  
563 and more sensitive to stratification compared to those produced by GREML-MS on imputed data  
564 (Fig. 2).

565 Using LDAK-SC on WGS data also resulted in biases. With only common variants, results  
566 mirrored those found using array and imputed variants (Fig. S5). However, when all WGS  
567 variants were used,  $h^2_{SNP}$  for very rare CV phenotypes was overestimated, especially in highly  
568 stratified samples, but underestimated for all other phenotypes. When using LDAK-MS on WGS

## Running Head: Comparison of SNP heritability methods

569 data, the biases were less extreme. However, LDAK-MS resulted in over-estimated  $h^2_{SNP}$  for  
570 common CVs and underestimated  $h^2_{SNP}$  for all other CV phenotypes (Fig. 2). Similar to LDAK-  
571 MS estimates of total  $h^2_{SNP}$ , using LDAK-MS to partition genetic variance among MAF ranges,  
572 produced estimates that were less precise and more biased than either GREML-MS or GREML-  
573 LDMS for the array, imputed, or WGS based GRMs (Figs. 3, S7-S9, S12-S13).

574 Much of the observed patterns was likely due to the relationship between MAF and LDAK  
575 weights (Fig. S14; ref.<sup>12</sup>) and differences in MAF distributions of array, imputed, and WGS  
576 variants (Fig. S2). More very rare variants were observed and given higher weightings in the  
577 WGS data than in either the imputed or array datasets. Similarly, in stratified datasets more very  
578 rare variants were imputed (Fig. S2) and this likely contributed to stratification effects and  
579 differences among imputed and WGS datasets.

580

### 581 **Extended Genealogy with Thresholded GRMs**

582 Patterns in the biases of  $h^2_{SNP}$  estimates were similar to those found using GREML-SC  
583 (Fig. 2) when using the extended genealogy method, demonstrating that  $h^2_{SNP}$  estimates are  
584 unaffected by the inclusion of close relatives so long as the model includes a second  
585 (thresholded) GRM that contains only information on genomic sharing among close relatives.  
586 However, the relative amount of variance attributable to the unthresholded GRM (estimating  
587  $h^2_{SNP}$ ) versus the thresholded GRM (estimating  $h^2_{IBS>t}$ ) varied considerably, and depended on  
588 whether common (MAF>0.01; Fig. S15) or all (Fig. S16) markers were used to estimate the  
589 GRMs. Using GRMs built from common (MAF>.01) array markers (Fig. S15), the estimate of  
590  $h^2_{IBS>t}$  was negative, while  $h^2_{SNP}$  was overestimated for common CV phenotypes. As CVs  
591 became rarer,  $h^2_{IBS>t}$  grew while  $h^2_{SNP}$  shrunk, consistent with Zaitlen et al.'s interpretation that

## Running Head: Comparison of SNP heritability methods

592  $h^2_{IBS>t}$  would estimate variance due to rarer CVs. This pattern was more pronounced when all  
593 markers were used (Fig. S16). Using imputed or WGS data, the pattern of negative variances  
594 estimated for some of the GRMs remained. Nevertheless, estimates of total heritability, similar  
595 to  $h^2_{FAM}$ , the sum of  $h^2_{IBS>t}$  and  $h^2_{SNP}$ , were nearly unbiased or slightly downwardly biased in most  
596 datasets and stratification subsamples (Fig. S15-S16). Even the total heritability of very rare CV  
597 phenotypes was underestimated by less than 5%, regardless of the dataset used (SNP, WGS, or  
598 imputed variant). It is important to note, however, that shared environmental effects can inflate  
599 estimates of total  $h^2$  using this method (see *Confounding between relatedness and shared*  
600 *environments* below).

601

### 602 **Treelet Covariance Smoothing (TCS)**

603 Estimates of  $h^2_{SNP}$  from the TCS approach were highly unstable. Using samples of  
604 unrelated individuals, the TCS method produced widely varying estimates of  $h^2_{SNP}$  depending on  
605 the CV MAF, level of stratification, and type of data used to build the GRM (Fig. 2). We note that  
606 the original implementation<sup>21</sup> used related individuals for  $h^2_{SNP}$  estimation; however, performance  
607 did not improve when using samples of related individuals (Figs. S4-S6). The estimated and  
608 empirical standard errors were substantially higher than any other estimation method (Fig. S7-  
609 S9). Moreover, the pattern of results was complex and depended strongly on the simulation  
610 condition; for estimates from GRMs built from array (Fig. S4) or imputed (Fig. S6) markers,  $h^2_{SNP}$   
611 was typically underestimated for all CV MAF frequencies irrespective of inclusion of close  
612 relatives. However,  $h^2_{SNP}$  estimates were too high when WGS data was used for certain  
613 combinations of CV MAF frequencies and stratification levels, and too low for others. It is  
614 possible the TCS method would work better in samples that included more close relatives, but it

515 should be noted that other approaches (e.g., the thresholded GRM approach above) that rely  
516 upon inclusion of close relatives produced unbiased total estimates with our sample sizes.

517

## 518 **LD Score Regression**

519 Estimates of  $h^2_{SNP}$  from LD Score Regression were similar when utilizing either Axiom  
520 SNPs, imputed, or WGS data (Figs. 2 and S4-S6), as were estimates of the intercept (which  
521 reflect the contribution of stratification and cryptic relatedness to the GWAS test statistics; Figs.  
522 S17-S19). Across data types,  $h^2_{SNP}$  was generally slightly underestimated (5-10%) for common  
523 CV phenotypes. This downward bias was slightly reduced in simulations using 10,000 causal  
524 variants, but remained (Fig. S20); it is possible that this bias would be eliminated under the truly  
525 infinitesimal model assumed by the model.  $h^2_{SNP}$  was increasingly underestimated for  
526 phenotypes caused by increasingly rare CVs (Fig. 2), regardless of data type. This  
527 underestimate of rare CV variation occurs because  $h^2_{SNP}$  is estimated only from common marker  
528 (MAF>0.01) GWAS statistics<sup>22</sup>, which are typically unaffected by rarer CVs. Interestingly, in the  
529 highly stratified subsample, common CV phenotype  $h^2_{SNP}$  was overestimated with no covariate  
530 correction with array SNPs, but controlling for PCs and sequencing cohorts using regression  
531 (Figs. 2 and S4-S6) or a mixed-model approach (GCTA-LOCO; Fig. S4) removed this bias,  
532 suggesting that  $h^2_{SNP}$  estimates from LD score regression are not immune to biases due to  
533 stratification.

534 Estimates of  $h^2_{SNP}$  using MAF-partitioned LD score regression were highly variable, but in  
535 many cases biased upwards (Fig. S4-S6). For common CV phenotypes, the estimates were less  
536 biased than the standard LD score regression estimates described above. However, with rarer  
537 CV phenotypes, regardless of the data used (array positions, imputed variants, or WGS data),

## Running Head: Comparison of SNP heritability methods

538  $h^2_{SNP}$  was severely overestimated, expected when including very rare SNPs in the  
539 regression<sup>19,22,34</sup>.

540 The genomic control inflation factor,  $\lambda_{GC}$ , was greater in more stratified subsamples  
541 without covariate correction, demonstrating the bias in GWAS with structure even in the absence  
542 of confounding environmental effects (Figs. S17-S19), consistent with previous work that shows  
543 structure alone can inflate GWAS test statistics<sup>32,35,36</sup> due to chance CV allele frequency  
544 differences. We confirmed this using simulated data for two populations spanning a range of  
545 structure ( $F_{ST}$ ) and polygenicity without confounding environmental effects (Fig. S21). After  
546 controlling for PC covariates using regression or by inclusion of a kinship matrix (using GCTA-  
547 LOCO; Axiom SNPs only), there was limited effect of stratification, but  $\lambda_{GC}$  was still greater than  
548 one for phenotypes derived from common, uncommon and rare CVs (Figs. S17-S19). That  $\lambda_{GC}$   
549 was not inflated for very rare CVs probably only reflects low statistical power for testing low MAF  
550 markers.

551 The LD score regression intercept, which reflects the amount of confounding by  
552 stratification and polygenicity<sup>22</sup>, was greater than one when no covariate control was applied  
553 across all stratification subsamples for all but the common CV traits (Figs. S17-S19). This was  
554 stronger for the more stratified subsamples, as expected. The intercept was  $\sim 1$  when the  
555 covariates (and relatedness using Axiom SNPs) were accounted for, with the exception of  
556 uncommon and rare CV phenotypes, which were slightly  $>1$ , suggesting that the control of  
557 covariates was sufficient to account for the majority of the inflation in test statistics due to  
558 stratification. We note that these simulations included no confounding environmental effects,  
559 which may covary with stratification, and lead to inflation of GWAS statistics independent of the  
560 inflation of the intercept observed here<sup>22</sup>. Nevertheless, such inflated GWAS statistics generally

## Running Head: Comparison of SNP heritability methods

561 should not be associated with the degree of LD-tagging of the markers, and thus should not  
562 inflate estimates of  $h^2_{SNP}$ .

563

### 564 **Confounding between relatedness and shared environments**

565 We tested the effect of confounding between relatedness and shared environment  
566 (simulated  $c^2 = 0.1$ ) for GREML-SC, LD score regression, and thresholded GRMs, using  
567 common array positions only. With unmodeled shared environmental effects, including all  
568 relatives and using GREML-SC resulted in overestimates of  $h^2_{SNP}$ , especially for rare CV  
569 phenotypes and for stratified samples (Fig. 4). However, when close relatives were removed at  
570 thresholds of 0.05 or 0.1, shared environmental effects produced no additional upward bias (Fig.  
571 4) over those observed when no shared environmental effects existed (Fig. 2) Thus, as  
572 previously argued<sup>6</sup> removing close relatives appears to correct for this type of shared  
573 environmental effect. Also as argued in ref.<sup>22</sup>,  $h^2_{SNP}$  from LD score regression was not biased  
574 upward due to unmodeled shared environmental effects, even when close relatives were  
575 included. Finally, using the thresholded GRM method with environmental confounding,  $h^2_{SNP}$  was  
576 biased slightly upward, particularly with a 0.1 relatedness threshold, but total heritability  
577 overestimation reached 20%, consistent with all or almost all shared environmental variance  
578 being estimated as additive genetic variance. Thus, care must be taken in interpreting results  
579 from methods that use SNP GRMs to estimate heritability when related individuals are included;  
580 shared environmental variance can masquerade as genetic variance.

581

### 582 ***Heritability of Complex Traits in the UK Biobank***

## Running Head: Comparison of SNP heritability methods

583 We applied the GREML-MS and GREML-LDMS approaches to six complex traits in the  
584 UK Biobank data, and partitioned estimates of the heritability by marker MAF using either directly  
585 genotyped Axiom SNPs or imputed genome-wide variants (Fig. 5, S23, Tables S6-S7). Total  
586  $h^2_{SNP}$  was on average 12% lower using imputed data rather than the directly genotyped Axiom  
587 positions; our simulation results suggest this may be due to overestimation of variation due to  
588 common CVs for array markers (Fig. S4) and slight underestimation of variation due to common  
589 CVs for imputed markers (Fig. S6) using this method. The difference between array and imputed  
590 data was most apparent in the estimates of  $h^2_{SNP}$  per MAF bin, where  $h^2_{SNP}$  was lower using  
591 imputed data for common variant bins ( $MAF > 0.01$ ), but higher for rarer MAF bins. For example,  
592 the rare MAF bins ( $MAF < 0.01$ ) accounted for 8.8% of the phenotypic variance of height using  
593 imputed markers but only 0.6% using genotyped SNPs, whereas common MAF bins accounted  
594 for 48% and 59%, respectively. Fluid intelligence was even more striking, with rarer SNPs  
595 accounting for 11% and 3.4% using imputed and directly genotyped markers, respectively, while  
596 common markers accounted for 14% and 20%. Our simulations results suggest the  $h^2_{SNP}$   
597 estimates from imputed data are more trustworthy.

598 Our simulation results also suggest that frequency distribution of CVs is best estimated  
599 using imputed data. The  $h^2_{SNP}$  across MAF bins from a GREML-MS model in the UK Biobank  
700 imputed data suggest real differences in genetic architectures across the six traits (Fig. 5) . For  
701 example, height and adiposity phenotypes (BMI, impedance, and trunk fat) appear to be  
702 influenced mostly be common CVs, whereas fluid intelligence appears to have an important  
703 contribution from rare ( $MAF < 0.01$ ) CVs. Results from GREML-MS (Fig. 5) were similar to those  
704 from GREML-LDMS (Fig. S23, Table S7), although GREML-LDMS suggested that more trait

## Running Head: Comparison of SNP heritability methods

705 variance, even that attributable to common SNPs, was due to variants in the lower half of LD  
706 scores.

707 Our results suggest that most of the genetic variance of these traits is attributable to  
708 relatively common ( $MAF > 0.01$ ) variants. However, the contribution of increasingly rare CVs is  
709 likely to be underestimated for a few reasons. First, our simulations suggest that variation due to  
710 very rare CVs ( $0.0003 < MAF < 0.0025$ ) is underestimated by  $\sim 20\%$  due to low imputation quality  
711 of rarer variants. Second, this under-estimate was probably more severe in these results given  
712 the imputation reference panel used in the UK Biobank data was half the size of the reference  
713 panel used in our simulations. The variation due to CVs not present in the imputation reference  
714 panel used for the UK Biobank (UK10K and 1,000 Genomes) were missed in our results.

715

## 716 **DISCUSSION**

### 717 **Performance of $h^2_{SNP}$ Methods in Simulated Data**

718 We have demonstrated that estimates of genetic variation using SNP data can be biased  
719 in a number of sometimes difficult to foresee ways, and depend strongly on a complex interplay  
720 between method used, the frequency distribution of CVs, the type of data used in the analysis,  
721 the degree of sample stratification, whether relatives are included or excluded, and the  
722 importance of shared environmental effects. Approaches that are able to explore genetic  
723 architecture of complex traits also differ in their ability to correctly estimate the CV frequency  
724 distributions. Understanding how the different methods behave under different contexts is crucial  
725 for proper interpretation of SNP-heritability estimates and for optimal design of future studies.  
726 There has been much debate surrounding the relative importance of common vs. rare variants



## Running Head: Comparison of SNP heritability methods

727 and the degree to which heritability remains unexplained (e.g., ref. <sup>7,12,13</sup>), and the findings  
728 presented here offer context for how results from these methods inform these debates.

729 Through simulations, we have provided evidence that the use of WGS data, in  
730 combination with genome partitioning methods such as GREML-MS or GREML-LDMS, results in  
731 roughly unbiased  $h^2$  estimates in unrelated samples, regardless of trait genetic architecture or  
732 population stratification in the sample, although variation due to extremely rare variants (e.g., de  
733 novo mutations) that are unshared between individuals in the sample will still be missed. Even  
734 with the most comprehensive imputation reference panel available, using imputed genome-wide  
735 markers still results in downwardly biased  $h^2_{SNP}$  estimates to the degree that rare variants are  
736 important to trait variation, but not nearly to the degree observed when using array markers. This  
737 is important, because it implies that the narrow-sense heritability remains underestimated in  
738 current studies using imputed data. Even with datasets using large reference panels, such as the  
739 UK Biobank data presented here,  $h^2_{SNP}$  from very rare CVs is likely underestimated due to poor  
740 imputation of rare SNPs. As imputation reference panels, such as the HRC and the forthcoming  
741 TOPMed panel<sup>37</sup>, continue to grow in size and diversity, accurate imputation of increasingly rarer  
742 variants will allow for increasingly accurate estimation of not the full narrow sense heritability, as  
743 well as for increasingly accurate estimation of the frequency distribution of CVs. Alternatively,  
744 novel methods, such as those that rely on sharing at identical-by-descent haplotypes rather than  
745 allele sharing at measured SNPs<sup>38</sup>, may better-capture effects of rare and poorly-tagged  
746 variants, and is a potential future direction for estimating the variation due to rare CVs.

747 Linkage disequilibrium (LD) between CVs and markers is central to the methods reviewed  
748 here. The observed patterns of over- and underestimation can be partly understood through the  
749 effect of LD among causal variants and markers (Fig. S11). As Yang et al.<sup>12</sup> demonstrated, using

## Running Head: Comparison of SNP heritability methods

750 GREML-SC,  $h^2_{SNP}$  estimates should be unbiased when the average LD between markers and  
751 CVs ( $\overline{r^2_{QM}}$ ) is the same as the average LD among all markers ( $\overline{r^2_{MM}}$ ), which occurs when  
752 markers and CVs are sampled from the same allele frequency distribution. This explains the  
753 underestimate of  $h^2_{SNP}$  using array genotypes when the CVs are rare, because common markers  
754 on an array typically have lower LD with rare CVs than with other markers, leading to  $\overline{r^2_{QM}} / \overline{r^2_{MM}}$   
755  $\ll 1$  and  $h^2_{SNP} \ll h^2$ . On the other hand, when the CVs are a random sample of markers, this  
756 ratio is  $\sim 1$  and the estimated  $h^2_{SNP} \approx h^2$ . Finally, when the CVs are more common than markers  
757 used to create the GRM, LD between common CVs and markers will typically be higher than LD  
758 among markers, leading to  $\overline{r^2_{QM}} / \overline{r^2_{MM}} > 1$  and  $h^2_{SNP} > h^2$ .

759 The bias arising from a mismatch in CV and marker frequency distributions is not  
760 alleviated by weighting of markers by LD. Speed et al.<sup>13</sup> showed that redundant marker tagging  
761 of CVs can bias  $h^2_{SNP}$  upward, and proposed weighting markers inversely to their LD score,  
762 which partially mitigates this bias in sparse genotype data. However, using such weights in  
763 dense whole genome sequence or imputed data leads to near 0 weights for most common  
764 markers, typically leading to underestimates of heritability arising from common CVs and,  
765 potentially, to overestimates of heritability from very rare CVs. What does appear to alleviate  
766 both the bias arising from a mismatch in CV and marker frequency distributions as well as the  
767 bias due to differential LD is binning markers by different MAF and LD bins<sup>12</sup>. When used on  
768 imputed or sequence data, GREML-MS and GREML-LDMS provide the most accurate  
769 partitioning of the variance and least biased total  $h^2_{SNP}$  estimates across genomic data types, CV  
770 frequency distributions, and levels of stratification. Although we showed that WGS is the ideal  
771 data source for creating GRMs, imputation will, for the time being, remain a cost-effective way to

## Running Head: Comparison of SNP heritability methods

772 capture most of the trait variation, and will only improve as sequencing initiatives continue to  
773 amass larger, publicly available reference panels.

774 Our simulation results highlighted both limitations and advantages to LD score regression.  
775 Although it uses a much different approach than GREML, LD score regression suffers from many  
776 of the same problems as single-component GREML approaches. LD regression leverages the  
777 fact that for common variants under an infinitesimal model, the effect size of a marker is related  
778 to how well it tags the surrounding variants (and therefore how likely it is to tag a CV)<sup>19,22</sup>.  
779 Because LD is strongly related to MAF, the method increasingly underestimates variation as CVs  
780 become rarer. Moreover, unlike GREML-MS, it provides unreliable estimates if used on rare  
781 variants ( $MAF < .01$ ), meaning that it cannot be used to accurately estimate CV frequency  
782 distributions, or variation due to rare CVs, even if GWAS statistics from imputed or WGS data  
783 are available. Nevertheless, LD score regression has several important advantages. Foremost  
784 among them, it can be used on summary statistics alone, bypassing the need for raw genotype  
785 data and allowing analyses based on sample sizes that would otherwise be impossible.  
786 Furthermore, as argued by its originators and as we have shown, it is generally robust to  
787 confounding biases due to stratification or shared family environmental effects, even when  
788 relatives are included in the sample. Finally, it is readily applied to various marker annotations in  
789 order to understand, for example, the relative importance of gene networks and functional  
790 categories<sup>19</sup>.

791 In our LD score regression simulation results, the contribution of common CVs to  
792 phenotypic variance were slightly underestimated, regardless of the data type used (array SNPs,  
793 imputed variants, or sequence data), a pattern previously reported<sup>39</sup>. This underestimate was not  
794 seen in the simulations performed by Bulik-Sullivan et al.<sup>22</sup>. This difference may stem from the

## Running Head: Comparison of SNP heritability methods

795 fact that Bulik-Sullivan et al.<sup>22</sup> simulated phenotypes caused by a much larger proportion of  
796 markers whereas we simulated phenotypes with only 1,000 or 10,000 CVs. Consistent with this  
797 possibility, when we increased the number of CVs to 10,000, our estimates were somewhat less  
798 biased. Nevertheless, it seems unlikely that the infinitesimal model truly holds for any phenotype,  
799 and thus  $h^2_{SNP}$  estimates from LD-regression are likely to be biased downward, especially as  
800 CVs become rarer.

801         There are several limitations to the findings presented here. First, although a subset of our  
802 simulations included shared environmental effects among close relatives, we did not model more  
803 complicated ways that environmental and genetic similarity can be confounded. For example, we  
804 did not simulate “vertical transmission” models in which distant ancestry can lead to low levels of  
805 environmental similarity, nor situations where environmental effects are confounded with  
806 ancestry. Previous studies have investigated this latter issue<sup>40,41</sup>, and fitting ancestry PCs  
807 removes much of the bias.

808         Second, other than varying CV MAF frequency distributions, we did not simulate  
809 situations where the LD of CVs differed systematically from the LD of markers used to estimate  
810 the GRM. As Speed et al.<sup>13</sup> demonstrated, if CVs come from regions of low LD (e.g., DNase I-  
811 hypersensitivity sites<sup>42</sup>),  $h^2_{SNP}$  will be underestimated and vice-versa when CVs come from  
812 regions of high LD. Yang et al.<sup>12</sup> have shown that GREML-LDMS accounts for LD differences  
813 between CVs and markers and provides unbiased estimates. However, as we shown (Fig. S7-  
814 S9), standard errors for GREML-LDMS results are higher than GREML-MS. Given this tradeoff,  
815 we recommend that investigators report results from both approaches, and trust those from  
816 GREML-LDMS if there is a difference.

817 Third, we simulated CV effect sizes that were proportional to their minor allele frequencies  
818 ( $\propto [p(1-p)]^{-\alpha}$ , where  $\alpha = -1$  in nomenclature of ref. <sup>13</sup>), so that the per-variant contribution to  
819 heritability remained constant across MAF, similar to other studies<sup>6,43,44</sup>. The validity of this  
820 assumption has been the subject of recent debate (e.g., ref. <sup>13,45,46</sup>) and it is clear that if this  
821 assumption is unmet in real data, using a single component model will bias estimates, as several  
822 well-designed evaluations of GREML-SC and LDAK-SC have shown<sup>13</sup>. However, two relevant  
823 findings from those studies bear mentioning. First, the scaling we applied ( $\alpha = -1$ ) is the most  
824 robust to violations of the model assumptions, and in sensitivity analyses of real data, scaling  
825 with various approaches often led to qualitatively and quantitatively similar conclusions<sup>12</sup>.  
826 Second, the GREML-MS and GREML-LDMS stratified approaches allow variances to differ  
827 across MAF partitions, effectively achieving the same goal as varying the scaling factor and  
828 allowing a greater exploration of CV frequency distributions. An interesting avenue of future work  
829 could be exploring possible values of  $\alpha$  among functional annotations for evidence of purifying or  
830 positive selection.

831

### 832 **$h^2_{SNP}$ Estimates in the UK Biobank**

833 Using over 120,000 individuals with imputed genome-wide variants, we obtained  
834 estimates of  $h^2_{SNP}$  for complex traits similar to those previously published using directly  
835 genotyped markers and imputed genome wide markers for height and BMI (e.g., ref. <sup>12</sup>).  
836 Estimates of  $h^2_{SNP}$  for measures of adiposity (impedance, trunk fat, and BMI) were similar to  
837 each other, as expected given the relationship between these traits. Accounting for imperfect  
838 imputation and using our simulation results as guidance, our results suggest that the true  
839 narrow-sense heritability of height is 60-70%, and that of BMI is 20-30%, with some additional

## Running Head: Comparison of SNP heritability methods

840 variation possibly from very rare and poorly-imputed CVs. Furthermore, the majority (~80%) of  
841 the additive genetic variance in these complex traits is explained by common variants with small  
842 additive effects, with a smaller proportion attributable to rarer variants. This finding has been  
843 discussed elsewhere<sup>6,12,13</sup>. This indicates that larger sample sizes will be required to identify  
844 common variants of very small effects in GWAS, but that little still-missing additive genetic  
845 variation remains.

846         The two behavioral traits we examined appear to have qualitatively different genetic  
847 architectures. Little of the additive genetic variance in neuroticism was explained by rare  
848 variants, but roughly half of fluid intelligence  $h^2_{SNP}$  was explained by rare variants with MAF <  
849 0.01. Family- and twin- based estimates of heritability of intelligence are ~50%, while recent  
850 studies using common SNPs have estimated  $h^2_{SNP} \sim 0.25$ <sup>47,48</sup>. Our estimates, using an  
851 independent sample, are not dissimilar from these, and accounting for the downward bias in  
852  $h^2_{SNP}$  using imputed data, heritability is likely ~30%, with roughly half of that from rare variants,  
853 and some additional variance caused by very rare and poorly-imputed CVs. However, given that  
854 we know that variation due to increasingly rare CVs is increasingly underestimated, it is possible  
855 that a larger proportion of the additive genetic variation in fluid intelligence is due to extremely  
856 rare CVs. Nevertheless, 30% is substantially lower than the ~50% estimates from family-based  
857 studies. However, it is also possible that these twin- and family-based estimates are  
858 overestimated, and that little remaining heritability will be explained by increasingly rare CVs.  
859 Our estimates of neuroticism heritability suggest that little of the variance is due to rare SNPs. In  
860 the UK Biobank data, our estimate of  $h^2_{SNP}$  (0.09) is slightly higher than some published  
861 estimates ( $h^2_{SNP} = 0.06$ [ref. <sup>49</sup>]), but lower than a recent study using the same UK Biobank data  
862 ( $h^2_{SNP} = 0.14-16$ [ref. <sup>50</sup>]). This may be due to our use of MAF-stratified GREML, rather than

## Running Head: Comparison of SNP heritability methods

863 single component GREML with array data as in Smith et al.<sup>50</sup>, which we have showed here leads  
864 to overestimation of variance due to common CVs. Extended-twin family studies, which can  
865 provide estimates of narrow-sense heritability while addressing concerns of shared  
866 environmental and non-additive genetic influences, suggest that the narrow-sense heritability of  
867 neuroticism is ~30%<sup>10</sup>, which still leaves much of the additive genetic variance unexplained and  
868 presents a puzzle to be solved by future investigation.

869

## 870 **Conclusions**

871 Heritability is a fundamental concept of genetics and its unbiased estimation is critical for  
872 understanding complex trait genetics as well as for designing better studies and obtaining a  
873 clearer picture of the possible explanatory power of GWAS. Below we provide our recommended  
874 best practices for studies aiming to estimate  $h^2_{SNP}$  and CV frequency distributions for complex  
875 traits. Even when applying these best approaches, heritability is still likely underestimated, but  
876 will improve as larger sample sizes, larger imputation panels, and better methods to account for  
877 rare variants are developed.

### 878 *Recommended Practices*

- 879 • Careful quality control in genetic data, for instance based on missingness and Hardy-  
880 Weinberg equilibrium, is critical, particularly for case-control data and/or when the sample  
881 is comprised of multiple cohorts<sup>44</sup>.
- 882 • Include appropriate covariates, such as principal components, cohorts, and other potential  
883 confounders as fixed effects in GREML models and in the GWAS models for LD score  
884 regression.

## Running Head: Comparison of SNP heritability methods

- 885 • MAF- and/or LD-stratified GREML approaches<sup>12</sup> on WGS or imputed data provide the  
886 most accurate estimates of  $h^2_{SNP}$  and CV frequency distributions. Even if CV frequency  
887 distributions are not of interest, these methods provide the most accurate estimates of  
888  $h^2_{SNP}$  and are also the most robust to biases caused by stratification and differences  
889 between the CV and marker allele frequency distributions. However, there is a bias-  
890 precision tradeoff: more GRMs lead to larger standard errors, necessitating larger sample  
891 sizes for these methods. We recommend to report results from both GREML-LDMS and  
892 GREML-MS, and to trust the results of GREML-LDMS if there is a meaningful difference.
- 893 • If possible, run GREML models on WGS data if available, and otherwise data imputed  
894 using the largest and most diverse reference panel possible. Currently, this is the HRC<sup>24</sup>.
- 895 • If raw genomic data is not available, use LD score regression on summary statistics, but  
896 calculate LD scores using a large sequence reference panel. Estimates from LD score  
897 regression are typically lower than those produced by GREML-SC on array data.
- 898 • Related individuals may share common environmental and non-additive genetic effects  
899 that can inflate estimates of  $h^2_{SNP}$ . Removing related individuals provides estimates that  
900 are less likely to be inflated by such environmental and non-additive genetic factors.
- 901 • Most reports of  $h^2_{SNP}$  in the literature have used the GREML-SC approach. However, as  
902 we have demonstrated, these estimates are subject to a number of sometimes conflicting  
903 biases, making interpretation of GREML-SC results challenging. Most crucially, GREML-  
904 SC is especially sensitive to the similarity between the frequency distributions of the CVs  
905 and the markers used to create the GRM, which can differ across genomic data types and  
906 array types. Moreover, GREML-SC can be sensitive to stratification effects, even when  
907 ancestry covariates are included in the model.



Running Head: Comparison of SNP heritability methods

908

909

910 **CONFLICTS OF INTEREST**

911 The authors declare no competing financial interests.

912

913 **SUPPLEMENTAL DATA DESCRIPTION**

914 The supplemental data includes 22 additional figures and 7 additional tables.

915

916 **CONSORTIA**

917 Haplotype Reference Consortium:

9181.

919 Shane McCarthy, Sayantan Das, Warren Kretzschmar, Olivier Delaneau, Andrew R Wood,

920 Alexander Teumer, Hyun Min Kang, Christian Fuchsberger, Petr Danecek, Kevin Sharp, Yang

921 Luo, Carlo Sidore, Alan Kwong, Nicholas Timpson, Seppo Koskinen, Scott Vrieze, Laura J Scott,

922 He Zhang, Anubha Mahajan, Jan Veldink, Ulrike Peters, Carlos Pato, Cornelia M van Duijn,

923 Christopher E Gillies, Ilaria Gandin, Massimo Mezzavilla, Arthur Gilly, Massimiliano Cocca,

924 Michela Traglia, Andrea Angius, Jeffrey C Barrett, Dorrett Boomsma, Kari Branham, Gerome

925 Breen, Chad M Brummett, Fabio Busonero, Harry Campbell, Andrew Chan, Sai Chen, Emily

926 Chew, Francis S Collins, Laura J Corbin, George Davey Smith, George Dedoussis, Marcus Dorr,

927 Alikei-Eleni Farmaki, Luigi Ferrucci, Lukas Forer, Ross M Fraser, Stacey Gabriel, Shawn Levy,

928 Leif Groop, Tabitha Harrison, Andrew Hattersley, Oddgeir L Holmen, Kristian Hveem, Matthias

929 Kretzler, James C Lee, Matt McGue, Thomas Meitinger, David Melzer, Josine L Min, Karen L

930 Mohlke, John B Vincent, Matthias Nauck, Deborah Nickerson, Aarno Palotie, Michele Pato,

Running Head: Comparison of SNP heritability methods

931 Nicola Pirastu, Melvin McInnis, J Brent Richards, Cinzia Sala, Veikko Salomaa, David  
932 Schlessinger, Sebastian Schoenherr, P Eline Slagboom, Kerrin Small, Timothy Spector, Dwight  
933 Stambolian, Marcus Tuke, Jaakko Tuomilehto, Leonard H Van den Berg, Wouter Van Rheenen,  
934 Uwe Volker, Cisca Wijmenga, Daniela Toniolo, Eleftheria Zeggini, Paolo Gasparini, Matthew G  
935 Sampson, James F Wilson, Timothy Frayling, Paul I W de Bakker, Morris A Swertz, Steven  
936 McCarroll, Charles Kooperberg, Annelot Dekker, David Altshuler, Cristen Willer, William Iacono,  
937 Samuli Ripatti, Nicole Soranzo, Klaudia Walter, Anand Swaroop, Francesco Cucca, Carl A  
938 Anderson, Richard M Myers, Michael Boehnke, Mark I McCarthy, Richard Durbin, Gonçalo  
939 Abecasis, & Jonathan Marchini

940

941

942

943

944 **ACKNOWLEDGMENTS**

945 This work was supported by NIH grant R01MH100141 (to MCK), NHMRC grants 1078037 (PMV)  
946 and 1113400 (PMV and JY), and Sylvia & Charles Viertel Charitable Foundation Senior Medical  
947 Research Fellowship (JY). We thank the participants of the individual HRC cohorts. This  
948 research has been conducted using the UK Biobank Resource. We thank Doug Speed for  
949 providing LDAK5. We thank the Keller and Vrieze lab groups, the Institute for Behavioral  
950 Genetics, the CU Research Computing facility, and Sean Caron.

951

952 **WEB RESOURCES**

953 BOLT-REML: <https://data.broadinstitute.org/alkesgroup/BOLT-LMM/>

Running Head: Comparison of SNP heritability methods

954 GCTA: <http://cnsgenomics.com/software/gcta/index.html>

955 Haplotype Reference Consortium: <http://www.haplotype-reference-consortium.org/home>

956 LD score regression: [github.com/bulik/ldsc/wiki](https://github.com/bulik/ldsc/wiki)

957 LDAK: <http://dougsped.com/ldak/>

958 UK Biobank: <http://www.ukbiobank.ac.uk/>

959

960

961

## 962 REFERENCES

963

964 1. Tenesa, A., and Haley, C.S. (2013). The heritability of human disease: estimation, uses and  
965 abuses. *Nat. Rev. Genet.* *14*, 139–149.

966 2. Visscher, P.M., Hill, W.G., and Wray, N.R. (2008). Heritability in the genomics era--concepts  
967 and misconceptions. *Nat. Rev. Genet.* *9*, 255–266.

968 3. Wood, A.R., Esko, T., Yang, J., Vedantam, S., Pers, T.H., Gustafsson, S., Chu, A.Y., Estrada,  
969 K., Luan, J., Kutalik, Z., et al. (2014). Defining the role of common variation in the genomic and  
970 biological architecture of adult human height. *Nat. Genet.* *46*, 1173–1186.

971 4. Visscher, P.M., Brown, M.A., McCarthy, M.I., and Yang, J. (2012). Five years of GWAS  
972 discovery. *Am. J. Hum. Genet.* *90*, 7–24.

973 5. Ripke, S., Neale, B.M., Corvin, A., Walters, J.T.R., Farh, K.-H., Holmans, P.A., Lee, P., Bulik-  
974 Sullivan, B., Collier, D.A., Huang, H., et al. (2014). Biological insights from 108 schizophrenia-  
975 associated genetic loci. *Nature* *511*, 421–427.

976 6. Yang, J., Benyamin, B., McEvoy, B.P., Gordon, S., Henders, A.K., Nyholt, D.R., Madden, P. a,

Running Head: Comparison of SNP heritability methods

- 977 Heath, A.C., Martin, N.G., Montgomery, G.W., et al. (2010). Common SNPs explain a large  
978 proportion of the heritability for human height. *Nat. Genet.* *42*, 565–569.
- 979 7. Zuk, O., Hechter, E., Sunyaev, S.R., and Lander, E.S. (2012). The mystery of missing  
980 heritability: Genetic interactions create phantom heritability. *Proc. Natl. Acad. Sci. U. S. A.* *109*,  
981 1193–1198.
- 982 8. Zaitlen, N., Kraft, P., Patterson, N., Pasaniuc, B., Bhatia, G., Pollack, S., and Price, A.L.  
983 (2013). Using extended genealogy to estimate components of heritability for 23 quantitative and  
984 dichotomous traits. *PLoS Genet.* *9*,.
- 985 9. Polderman, T.J.C., Benyamin, B., de Leeuw, C.A., Sullivan, P.F., van Bochoven, A., Visscher,  
986 P.M., and Posthuma, D. (2015). Meta-analysis of the heritability of human traits based on fifty  
987 years of twin studies. *Nat. Genet.* *47*, 702–709.
- 988 10. Keller, M.C., and Coventry, W.L. (2005). Quantifying and addressing parameter  
989 indeterminacy in the classical twin design. *Twin Res. Hum. Genet.* *8*, 201–213.
- 990 11. Eaves, L.J., Last, K.A., Young, P.A., and Martin, N.G. (1978). Model-fitting approaches to the  
991 analysis of human behaviour. *Heredity (Edinb).* *41*, 249–320.
- 992 12. Yang, J., Bakshi, A., Zhu, Z., Hemani, G., Vinkhuyzen, A.A.E., Lee, S.H., Robinson, M.R.,  
993 Perry, J.R.B., Nolte, I.M., van Vliet-Ostaptchouk, J. V, et al. (2015). Genetic variance estimation  
994 with imputed variants finds negligible missing heritability for human height and body mass index.  
995 *Nat. Genet.* *47*, 1114–1120.
- 996 13. Speed, D., Hemani, G., Johnson, M.R., and Balding, D.J. (2012). Improved heritability  
997 estimation from genome-wide SNPs. *Am. J. Hum. Genet.* *91*, 1011–1021.
- 998 14. Maier, R., Moser, G., Chen, G.-B., Ripke, S., Coryell, W., Potash, J.B., Scheftner, W.A., Shi,  
999 J., Weissman, M.M., Hultman, C.M., et al. (2015). Joint analysis of psychiatric disorders

Running Head: Comparison of SNP heritability methods

- 000 increases accuracy of risk prediction for schizophrenia, bipolar disorder, and major depressive  
001 disorder. *Am. J. Hum. Genet.* 96, 283–294.
- 002 15. Hyde, C.L., Nagle, M.W., Tian, C., Chen, X., Paciga, S.A., Wendland, J.R., Tung, J.Y.,  
003 Hinds, D.A., Perlis, R.H., and Winslow, A.R. (2016). Identification of 15 genetic loci associated  
004 with risk of major depression in individuals of European descent. *Nat. Genet.* 48, 1031–1036.
- 005 16. Okbay, A., Baselmans, B.M.L., De Neve, J.-E., Turley, P., Nivard, M.G., Fontana, M.A.,  
006 Meddens, S.F.W., Linnér, R.K., Rietveld, C.A., Derringer, J., et al. (2016). Genetic variants  
007 associated with subjective well-being, depressive symptoms, and neuroticism identified through  
008 genome-wide analyses. *Nat. Genet.* 633, 1–13.
- 009 17. Yang, J., Manolio, T.A., Pasquale, L.R., Boerwinkle, E., Caporaso, N., Cunningham, J.M., de  
010 Andrade, M., Feenstra, B., Feingold, E., Hayes, M.G., et al. (2011). Genome partitioning of  
011 genetic variation for complex traits using common SNPs. *Nat. Genet.* 43, 519–525.
- 012 18. Loh, P.-R., Bhatia, G., Gusev, A., Finucane, H.K., Bulik-Sullivan, B.K., Pollack, S.J.,  
013 Psychiatric Genomics Consortium, S.W.G., de Candia, T.R., Lee, S.H., Wray, N.R., et al. (2015).  
014 Contrasting regional architectures of schizophrenia and other complex diseases using fast  
015 variance components analysis. *Nat. Genet.* 47, 1385–1392.
- 016 19. Finucane, H.K., Bulik-Sullivan, B., Gusev, A., Trynka, G., Reshef, Y., Loh, P.-R., Anttila, V.,  
017 Xu, H., Zang, C., Farh, K., et al. (2015). Partitioning heritability by functional annotation using  
018 genome-wide association summary statistics. *Nat. Genet.* 47, 1228–1235.
- 019 20. Yang, J., Lee, S.H., Goddard, M.E., and Visscher, P.M. (2011). GCTA: A tool for genome-  
020 wide complex trait analysis. *Am. J. Hum. Genet.* 88, 76–82.
- 021 21. Crossett, A., Lee, A.B., Klei, L., Devlin, B., and Roeder, K. (2013). Refining genetically  
022 inferred relationships using Treelet Covariance Smoothing. *Ann. Appl. Stat.* 7, 669–690.

Running Head: Comparison of SNP heritability methods

- 023 22. Bulik-Sullivan, B.K., Loh, P.-R., Finucane, H.K., Ripke, S., Yang, J., Conso-trium, S.W.G. of  
024 the P.G., Patterson, N., Daly, M.J., Price, A.L., and Neale, B.M. (2015). LD Score regression  
025 distinguishes confounding from polygenicity in genome-wide association studies. *Nat. Genet.* 47,  
026 291–295.
- 027 23. Sudlow, C., Gallacher, J., Allen, N., Beral, V., Burton, P., Danesh, J., Downey, P., Elliott, P.,  
028 Green, J., Landray, M., et al. (2015). UK Biobank: An Open Access Resource for Identifying the  
029 Causes of a Wide Range of Complex Diseases of Middle and Old Age. *PLoS Med.* 12, 1–10.
- 030 24. McCarthy, S., Das, S., Kretzschmar, W., Delaneau, O., Wood, A.R., Teumer, A., Kang, H.M.,  
031 Fuchsberger, C., Danecek, P., Sharp, K., et al. (2016). A reference panel of 64,976 haplotypes  
032 for genotype imputation. *Nat. Genet.* 48, 1279–1283.
- 033 25. Abraham, G., and Inouye, M. (2014). Fast principal component analysis of large-scale  
034 genome-wide data. *PLoS One* 9, e92766.
- 035 26. Chang, C.C., Chow, C.C., Tellier, L.C., Vattikuti, S., Purcell, S.M., Lee, J.J., Purcell, S.,  
036 Neale, B., Todd-Brown, K., Thomas, L., et al. (2015). Second-generation PLINK: rising to the  
037 challenge of larger and richer datasets. *Gigascience* 4, 7.
- 038 27. Team, R.C. (2015). R: A language and environment for statistical computing. R Foundation  
039 for Statistical Computing, Vienna, Austria.
- 040 28. Delaneau, O., Zagury, J.-F., and Marchini, J. (2013). Improved whole-chromosome phasing  
041 for disease and population genetic studies. *Nat. Methods* 10, 5–6.
- 042 29. Das, S., Forer, L., Schön-herr, S., Sidore, C., Locke, A.E., Kwong, A., Vrieze, S.I., Chew,  
043 E.Y., Levy, S., McGue, M., et al. (2016). Next-generation genotype imputation service and  
044 methods. *Nat. Genet.* 48, 1284–1287.
- 045 30. Lee, S.H., DeCandia, T.R., Ripke, S., Yang, J., Sullivan, P.F., Goddard, M.E., Keller, M.C.,

Running Head: Comparison of SNP heritability methods

- 046 Visscher, P.M., and Wray, N.R. (2012). Estimating the proportion of variation in susceptibility to  
047 schizophrenia captured by common SNPs. *Nat. Genet.* *44*, 247–250.
- 048 31. Liu, D., and Gaugler, T. (2015). treelet: An adaptive multi-scale basis for high-dimensional,  
049 sparse and unordered data. R package version 1.1.
- 050 32. Yang, J., Zaitlen, N.A., Goddard, M.E., Visscher, P.M., and Price, A.L. (2014). Advantages  
051 and pitfalls in the application of mixed-model association methods. *Nat. Genet.* *46*, 100–106.
- 052 33. Xia, C., Amador, C., Huffman, J., Trochet, H., Campbell, A., Porteous, D., Hastie, N.D.,  
053 Hayward, C., Vitart, V., Navarro, P., et al. (2016). Pedigree- and SNP-Associated Genetics and  
054 Recent Environment are the Major Contributors to Anthropometric and Cardiometabolic Trait  
055 Variation. *PLoS Genet.* *12*, e1005804.
- 056 34. Bulik-Sullivan, B., Finucane, H.K., Anttila, V., Gusev, A., Day, F.R., Consortium, R.,  
057 Genomics Consortium, P., of the Wellcome Trust Consortium, G.C. for A., Perry, J.R.B.,  
058 Patterson, N., et al. (2015). An Atlas of Genetic Correlations across Human Diseases and Traits.  
059 *Nat. Genet.* *47*, 1236–1241.
- 060 35. Marchini, J., Cardon, L.R., Phillips, M.S., and Donnelly, P. (2004). The effects of human  
061 population structure on large genetic association studies. *Nat. Genet.* *36*, 512–517.
- 062 36. Price, A.L., Zaitlen, N. a, Reich, D., and Patterson, N. (2010). New approaches to population  
063 stratification in genome-wide association studies. *Nat. Rev. Genet.* *11*, 459–463.
- 064 37. TOPMed NHLBI.
- 065 38. Browning, S.R., and Browning, B.L. (2013). Identity-by-descent-based heritability analysis in  
066 the Northern Finland Birth Cohort. *Hum. Genet.* *132*, 129–138.
- 067 39. Yang, J., Bakshi, A., Zhu, Z., Hemani, G., Vinkhuyzen, A.A.E., Nolte, I.M., van Vliet-  
068 Ostaptchouk, J. V., Snieder, H., Esko, T., Milani, L., et al. (2015). Genome-wide genetic

Running Head: Comparison of SNP heritability methods

- 069 homogeneity between sexes and populations for human height and body mass index. *Hum. Mol.*  
070 *Genet.* 24, 7445–7449.
- 071 40. Browning, S.R., and Browning, B.L. (2011). Population structure can inflate SNP-based  
072 heritability estimates. *Am. J. Hum. Genet.* 89, 191–193.
- 073 41. Goddard, M.E., Lee, S.H., Yang, J., Wray, N.R., and Visscher, P.M. (2011). Response to  
074 Browning and Browning. *Am. J. Hum. Genet.* 89, 193–195.
- 075 42. Gusev, A., Lee, S.H., Trynka, G., Finucane, H., Vilhj?lmsson, B.J., Xu, H., Zang, C., Ripke,  
076 S., Bulik-Sullivan, B., Stahl, E., et al. (2014). Partitioning heritability of regulatory and cell-type-  
077 specific variants across 11 common diseases. *Am. J. Hum. Genet.* 95, 535–552.
- 078 43. Zaitlen, N., Pasaniuc, B., Sankararaman, S., Bhatia, G., Zhang, J., Gusev, A., Young, T.,  
079 Tandon, A., Pollack, S., Vilhj?lmsson, B.J., et al. (2014). Leveraging population admixture to  
080 characterize the heritability of complex traits. *Nat. Genet.* 46, 1356–1362.
- 081 44. Lee, S.H., Wray, N.R., Goddard, M.E., and Visscher, P.M. (2011). Estimating missing  
082 heritability for disease from genome-wide association studies. *Am. J. Hum. Genet.* 88, 294–305.
- 083 45. Lee, S.H., Yang, J., Chen, G.B., Ripke, S., Stahl, E.A., Hultman, C.M., Sklar, P., Visscher,  
084 P.M., Sullivan, P.F., Goddard, M.E., et al. (2013). Estimation of SNP heritability from dense  
085 genotype data. *Am. J. Hum. Genet.* 93, 1151–1155.
- 086 46. Speed, D., Hemani, G., Johnson, M.R., and Balding, D.J. (2013). Response to Lee et al.:  
087 SNP-based heritability analysis with dense data. *Am. J. Hum. Genet.* 93, 1155–1157.
- 088 47. Plomin, R., and Deary, I. (2014). Genetics and intelligence differences: five special findings.  
089 *Mol. Psychiatry* 20, 98–108.
- 090 48. Davies, G., Armstrong, N., Bis, J.C., Bressler, J., Chouraki, V., Giddaluru, S., Hofer, E.,  
091 Ibrahim-Verbaas, C.A., Kirin, M., Lahti, J., et al. (2015). Genetic contributions to variation in



Running Head: Comparison of SNP heritability methods

092 general cognitive function: a meta-analysis of genome-wide association studies in the CHARGE  
093 consortium (N=53949). *Mol. Psychiatry* 20, 183–192.

094 49. Vinkhuyzen, A., Pedersen, N.L., Yang, J., Lee, S.H., Magnusson, P.K.E., Iacono, W.G.,  
095 McGue, M., Madden, P., Heath, a C., Luciano, M., et al. (2012). Common SNPs explain some of  
096 the variation in the personality dimensions of neuroticism and extraversion. *Transl. Psychiatry* 2,  
097 e102.

098 50. Smith, D.J., Escott-Price, V., Davies, G., Bailey, M.E.S., Colodro-Conde, L., Ward, J.,  
099 Vedernikov, A., Marioni, R., Cullen, B., Lyall, D., et al. (2016). Genome-wide analysis of over 106  
100 000 individuals identifies 9 neuroticism-associated loci. *Mol. Psychiatry* 21, 749–757.

101

102

103 **FIGURE TITLES AND LEGENDS**

104

105 **Figure 1.** Population structure subsamples of European ancestry individuals in the HRC (A-D).  
106 and UK Biobank individuals projected onto these axes (E). Total sample sizes are shown in  
107 each panel. To keep sample size constant across stratification level, we randomly sampled  
108 8,201 individuals with relatedness  $< 0.1$  (the number of unrelated individuals in the most  
109 homogeneous and smallest set in panel D) from each subsample to create the subsamples used  
110 in the simulations.

111

112 **Figure 2.** Average  $h^2_{SNP}$  estimates across 100 replicates ( $\pm$  SEM) from GRMs built from Axiom  
113 array positions (left), whole genome sequence data (center), or imputed genome-wide variants  
114 (right). Horizontal panels show MAF ranges (specified in insert) of 1,000 randomly chosen causal

Running Head: Comparison of SNP heritability methods

115 variants (CVs). Methods are listed on the X-axis as follows: Single component GREML (GREML-  
116 SC); MAF-stratified GREML (GREML-MS); LD- & MAF-stratified GREML (GREML-LDMS);  
117 Single-component Linkage Disequilibrium-Adjusted Kinships (LDAK-SC); MAF-stratified LDAK  
118 (LDAK-MS); Treelet Covariance Smoothing (TCS); Extended Genealogy with Thresholded  
119 GRMs; LD Score Regression using no PCs as covariates in GWAS, using PCs as covariates, or  
120 using both PCs and the kinship matrix; and Single Component and MAF-stratified BOLT-REML.  
121 Estimates are from samples of unrelated individuals (relatedness <0.05) except for samples  
122 used in the Threshold GRM method, which included all individuals. For the Threshold GRM  
123 method we plot  $h^2_{SNP}$  rather than total  $h^2$  ( $h^2_{SNP} + h^2_{ibs>t}$ ) from models where  $t = .05$ . Dotted line is  
124 the simulated (true)  $h^2 = 0.5$ . Colors represent the 4 subsamples varying in genetic structure.  
125 See Figs. S4-6 for estimates using different relatedness thresholds.

126  
127 **Figure 3.** Average of 100  $h^2_{SNP}$  estimates ( $\pm$  SEM) from GRMs constructed from imputed  
128 genome-wide variants of different MAF ranges (different symbols) in samples of unrelated  
129 (<0.05) individuals. Horizontal panels show MAF ranges (specified in insert) of 1,000 randomly  
130 chosen CVs and colors represent the 4 subsamples varying in genetic structure. GREML-MS &  
131 GREML-LDMS partition the phenotypic variance to the correct MAF-range GRM, while LDAK-  
132 MS often attributed genetic variance to incorrect GRMs.

133  
134 **Figure 4.** Mean heritability estimates ( $\pm$  SEM) from 100 replicates of phenotypes simulated with  
135 or without confounding shared environmental effects among families for three different methods  
136 (x axis) for different genetic architectures. GRMs were estimated using common (MAF>0.01)  
137 array SNP positions for the most structured and most homogeneous stratification subsamples

Running Head: Comparison of SNP heritability methods

138 only. Different symbols indicate the relatedness cutoffs used. For GREML-SC, we used three  
139 thresholds, including no relatedness cutoff (all individuals included). For LD Score Regression,  
140 we did not apply a 0.1 relatedness cutoff, as most studies will use a 0.05 or lower threshold for  
141 individuals included in GWAS. The threshold GRM approach requires all individuals, and the  
142 different symbols indicates the relatedness threshold ( $t$ ) below which the thresholded GRM was  
143 set to 0.  $h^2_{Total}$  is the sum of both variance components,  $h^2_{SNP}$  is the variance component of the  
144 unthresholded GRM. Each horizontal panel indicates the minor allele frequency (MAF) range of  
145 the 1,000 randomly chosen causal variants (CV), with the range specified in the inset.

146

147 **Figure 5.** Estimates of MAF partitioned  $h^2_{SNP}$  using GREML-MS on Axiom array SNPs (left) and  
148 imputed genome-wide variants (center) for six complex traits in the UK Biobank. Total  $h^2_{SNP}$   
149 shown on right.

150

151

152

153

## Population Structure Subsamples

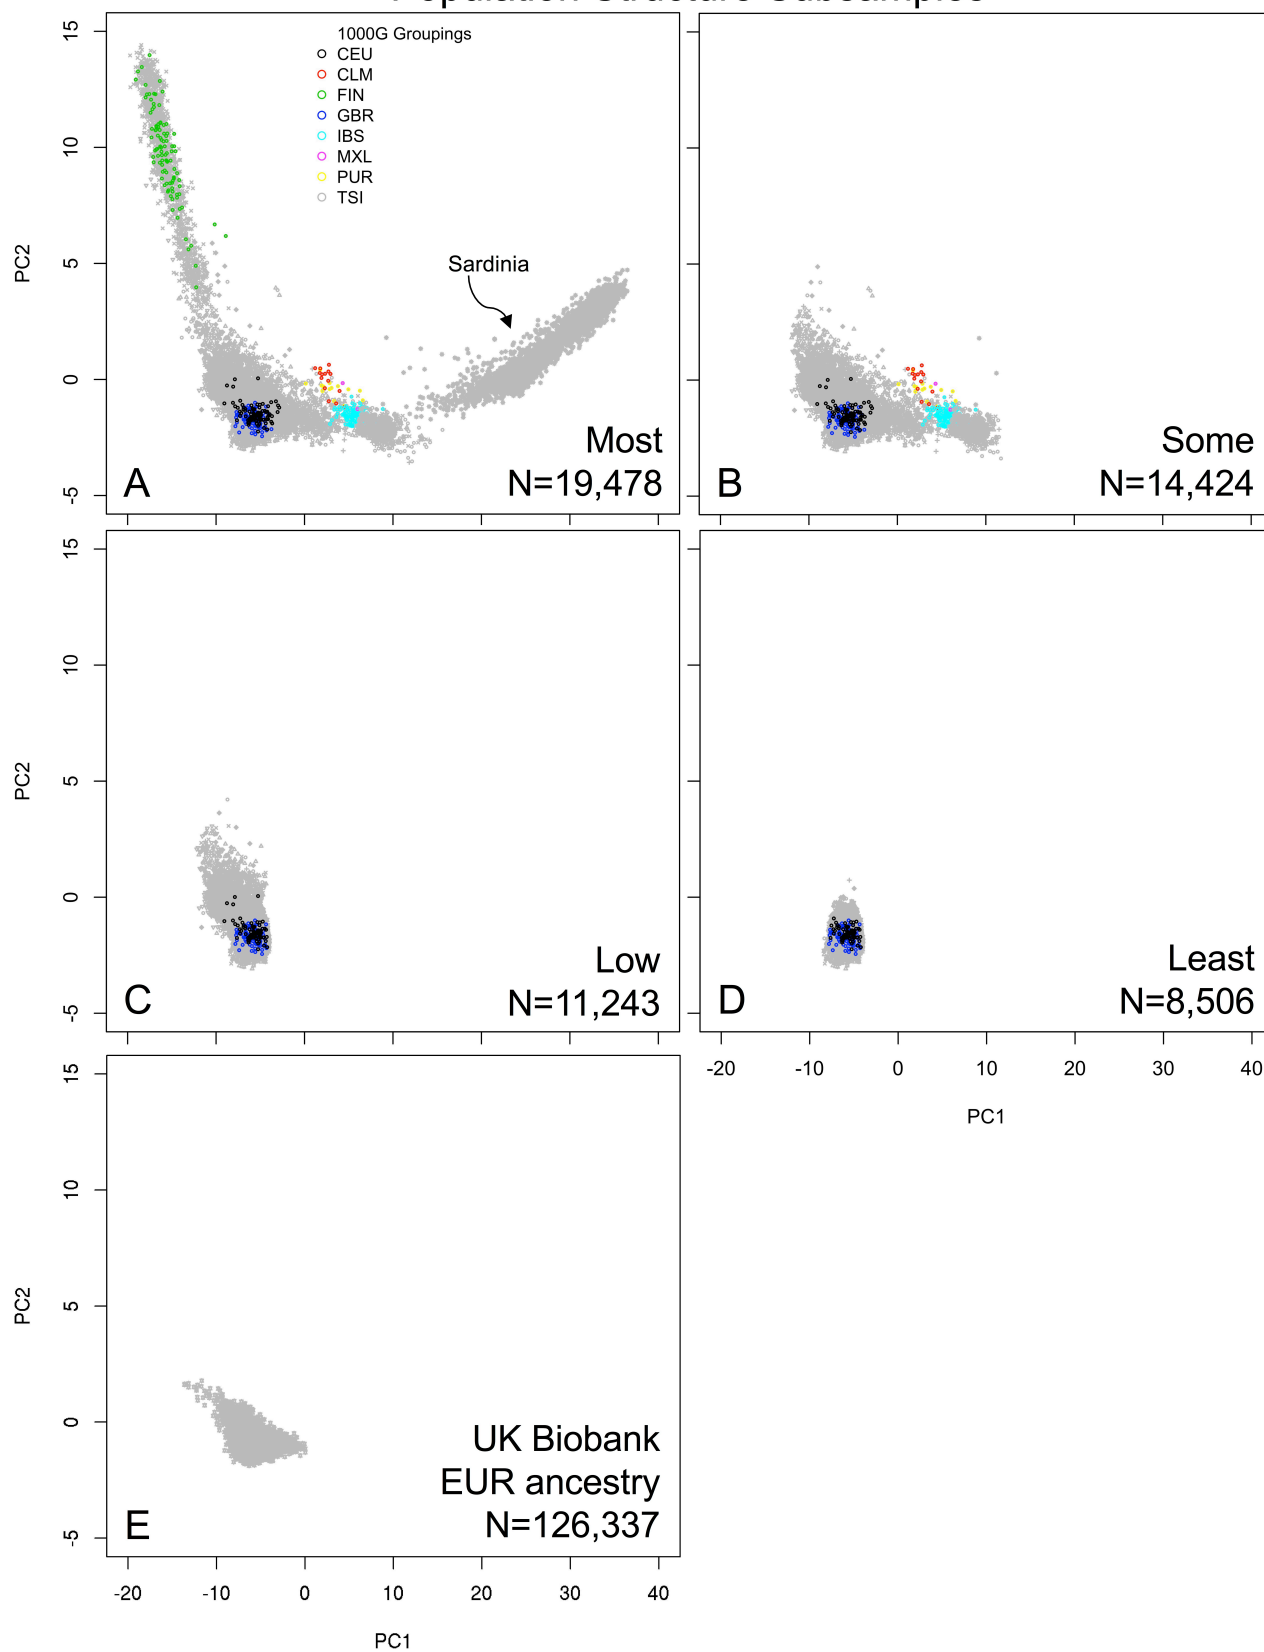

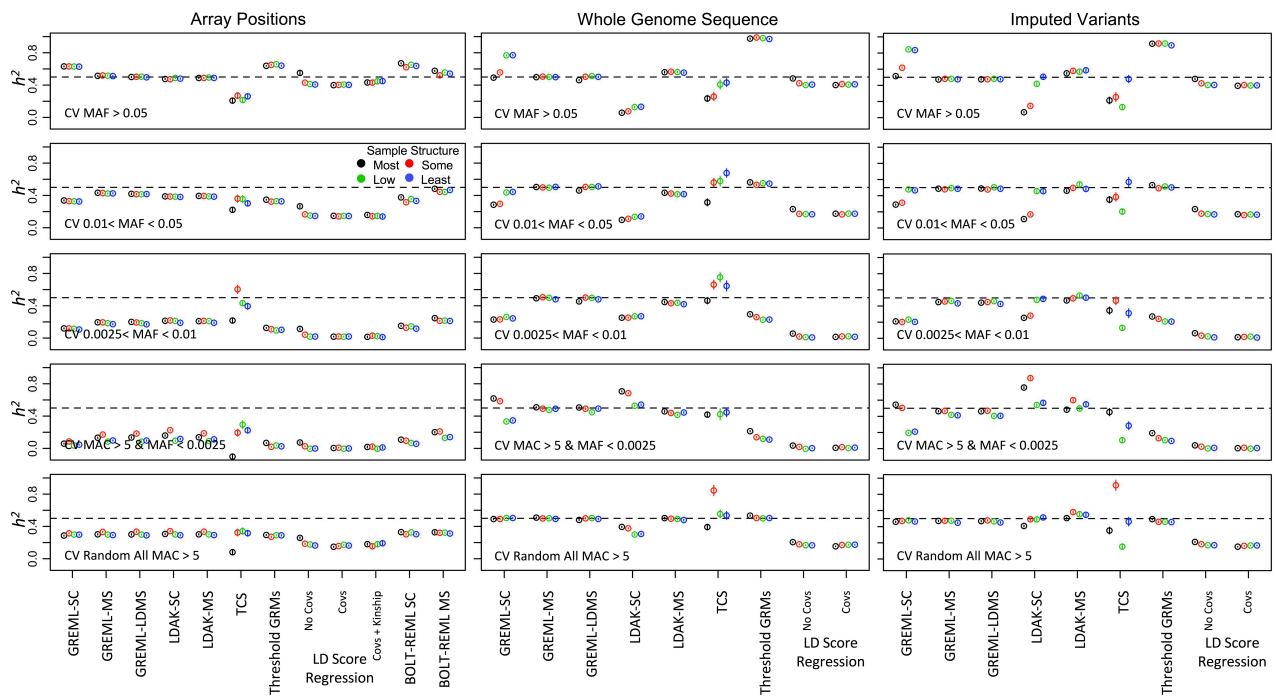

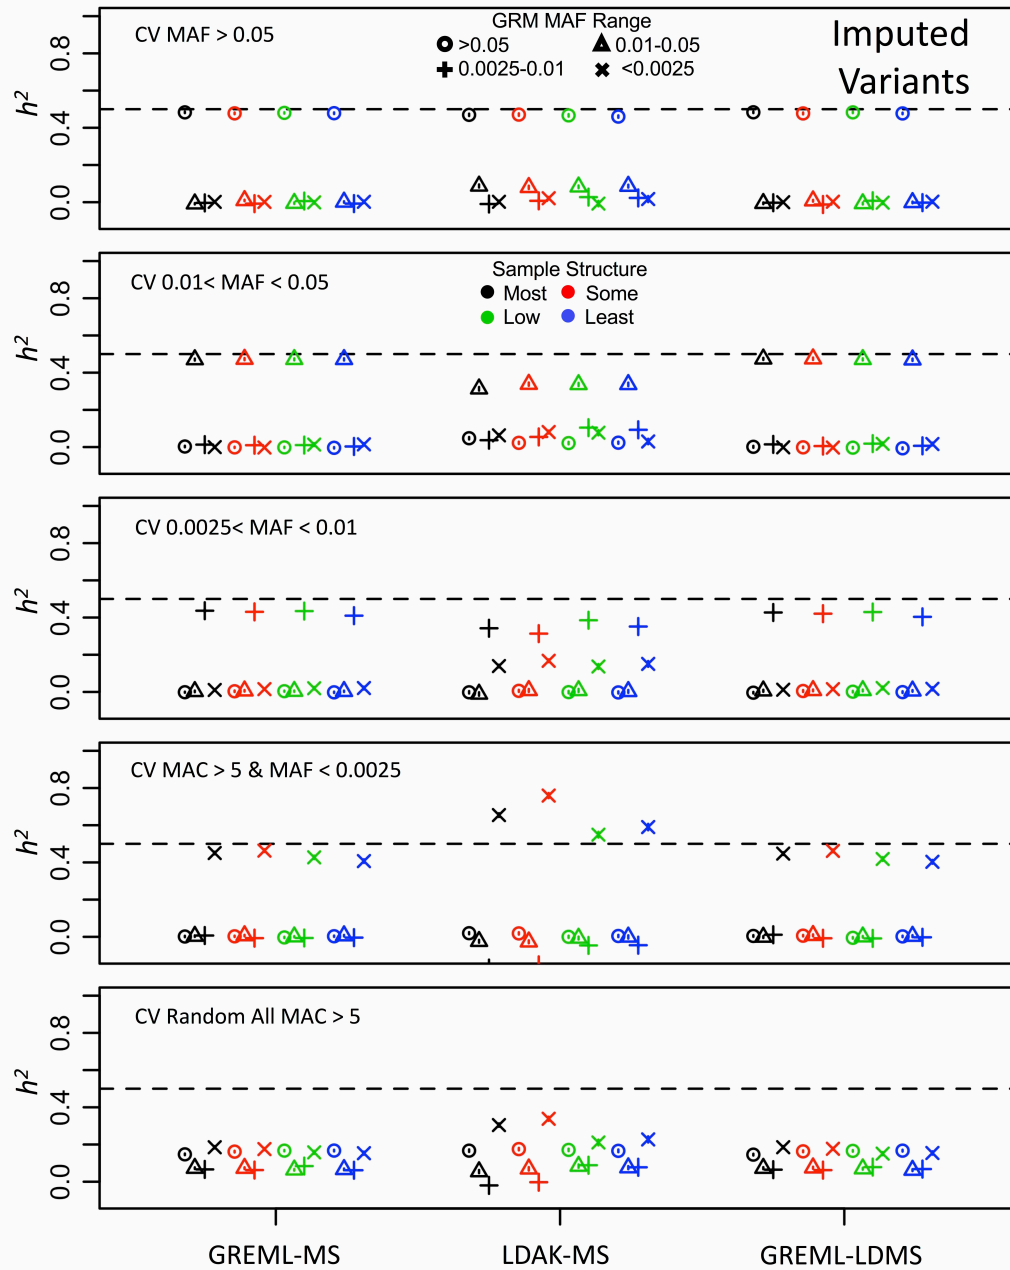

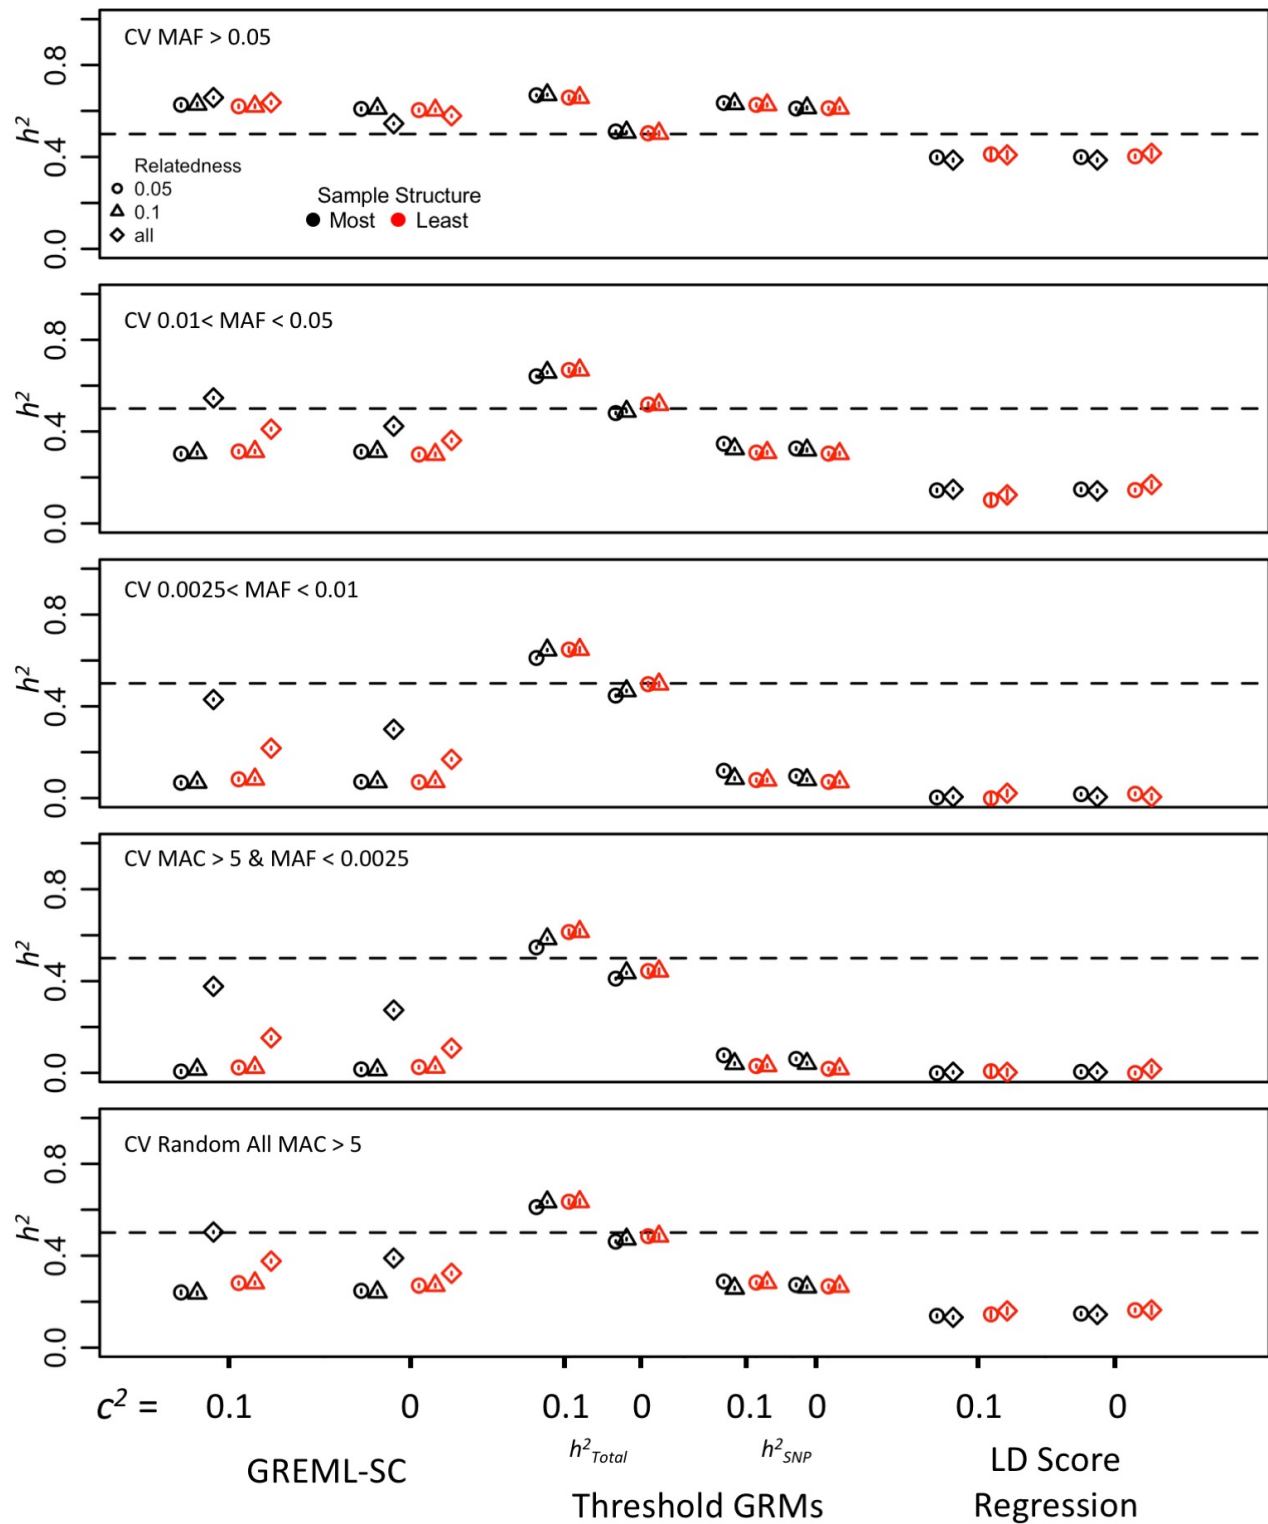

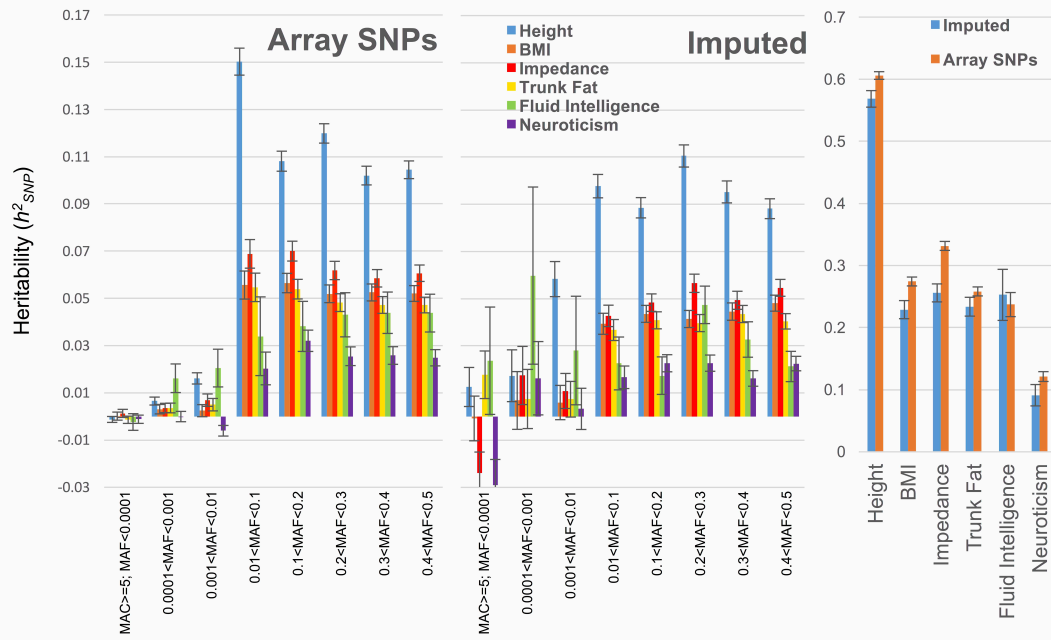

Source: http://www.biorxiv.org/content/biorxiv/early/2017/03/09/115527.full.pdf
